# Supplementary material
Source: PubMed Central journal article supplement (PMC8546625)
Supplement: jamainternmed-e215726-s001.pdf [file jamainternmed-e215726-s001.pdf]

## Supplementary Online Content

O'Fee K, Deych E, Ciani O, Brown DL. Assessment of nonfatal myocardial infarction as a surrogate for all-cause and cardiovascular mortality in treatment or prevention of coronary artery disease: a meta-analysis of randomized clinical trials. *JAMA Intern Med*. Published online October 25, 2021. doi:10.1001/jamainternmed.2021.5726

**eFigure 1.** Funnel Plots for Nonfatal Myocardial Infarction and All-cause Mortality

**eFigure 2.** Treatment Effect of Myocardial Infarction (MI) and All-cause Mortality by Study Type

**eFigure 3.** Subgroup Analysis by Years of Follow-up for the Association Between the Logarithm of the Odds Ratios (OR) for Surrogate End Point of Myocardial Infarction (MI) and True Endpoint of All-cause Mortality

**eFigure 4.** Subgroup Analysis by Type of Control Arm for the Association Between the Logarithm of the Odds Ratios (OR) for Surrogate End Point of Myocardial Infarction (MI) and True End Point of All-cause Mortality

**eAppendix.** Search Strategy

**eTable 1.** Trial Characteristics

**eTable 2.** Assessment of Risk of Bias

**eTable 3.** Trial Abbreviations, Names, and Date of Publication

**eReferences**

This supplementary material has been provided by the authors to give readers additional information about their work.

**Figure 1. Funnel plots for nonfatal myocardial infarction and all-cause mortality.**

**1A. Nonfatal myocardial infarction**

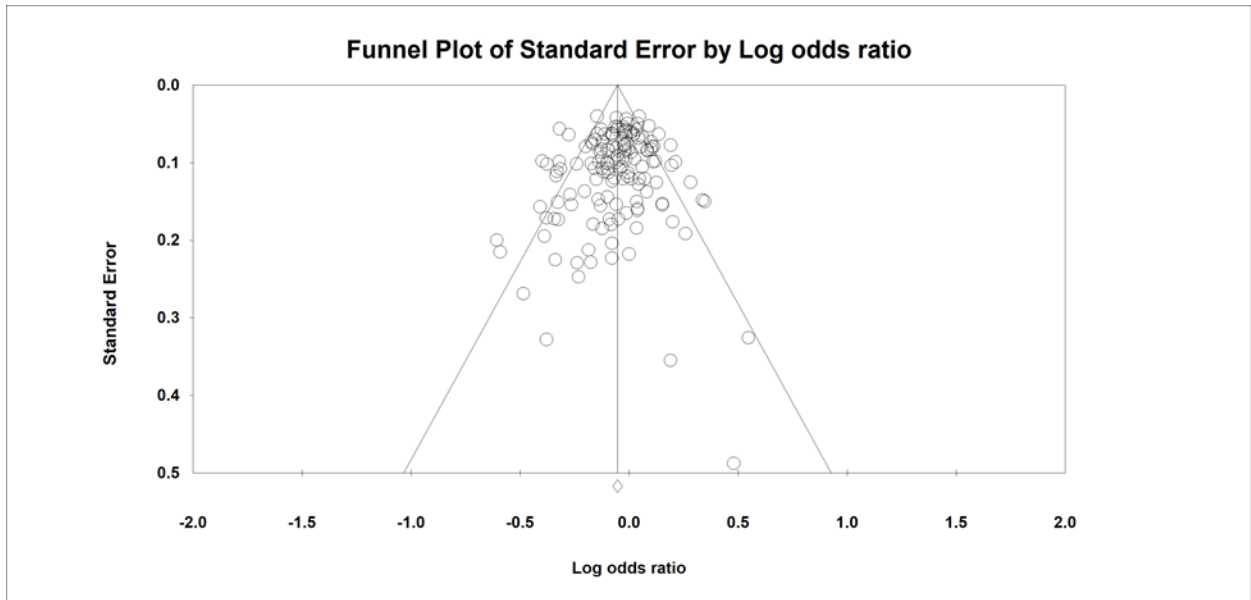

**1B. All-cause mortality**

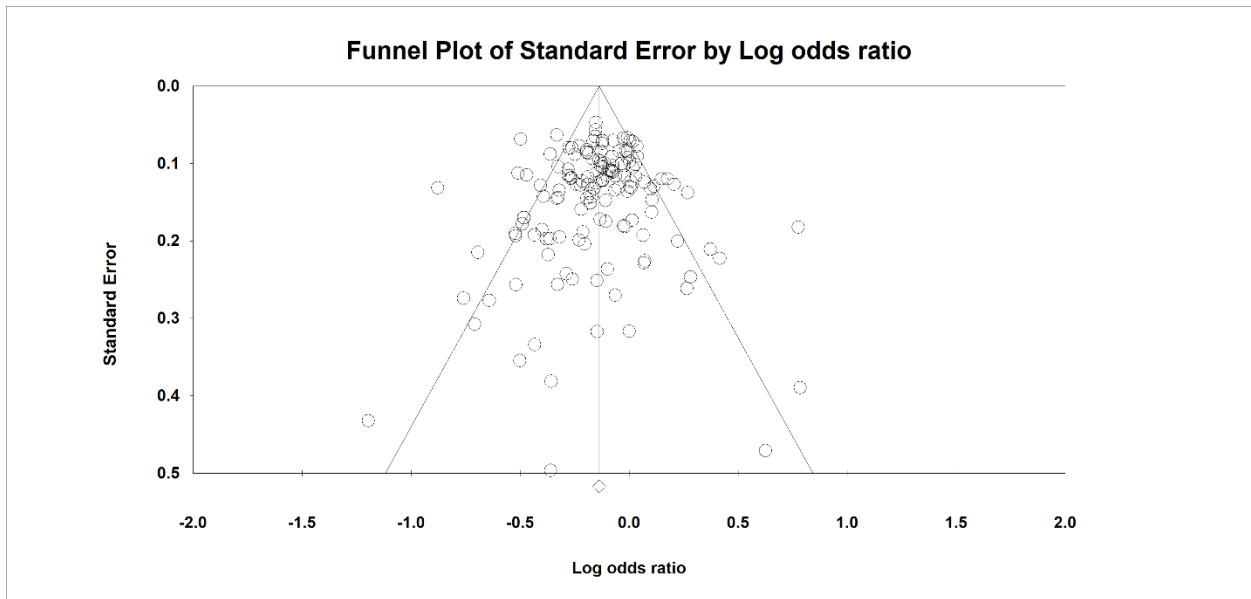

**eFigure 2.** Treatment effect of myocardial infarction (MI) and all-cause mortality by study type

**2A. Revascularization**

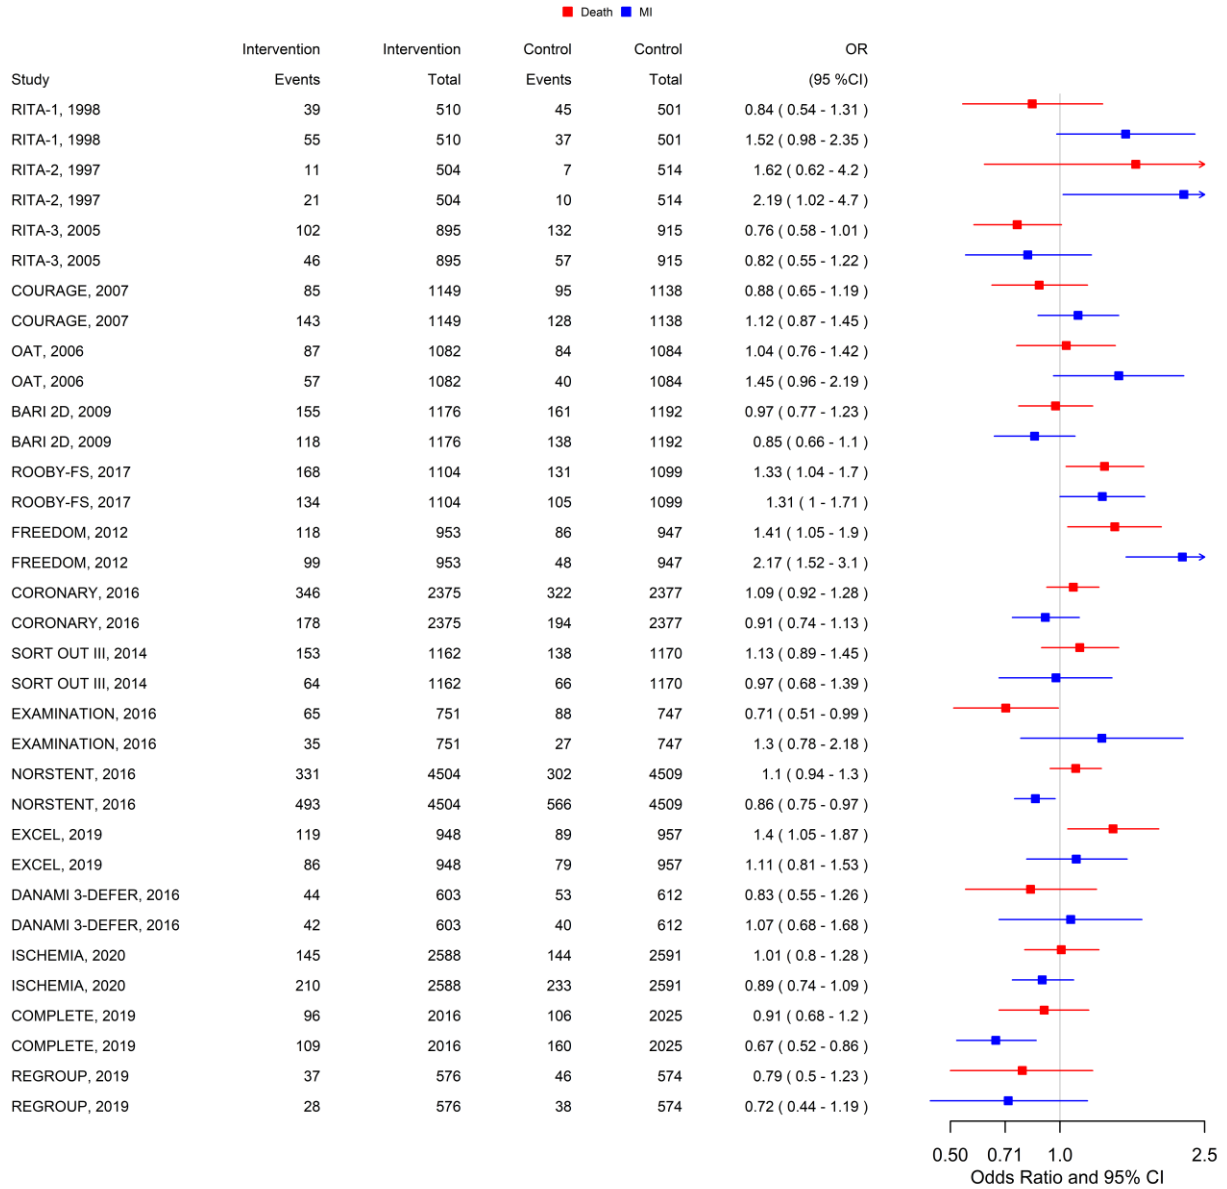

## 2B. Primary prevention

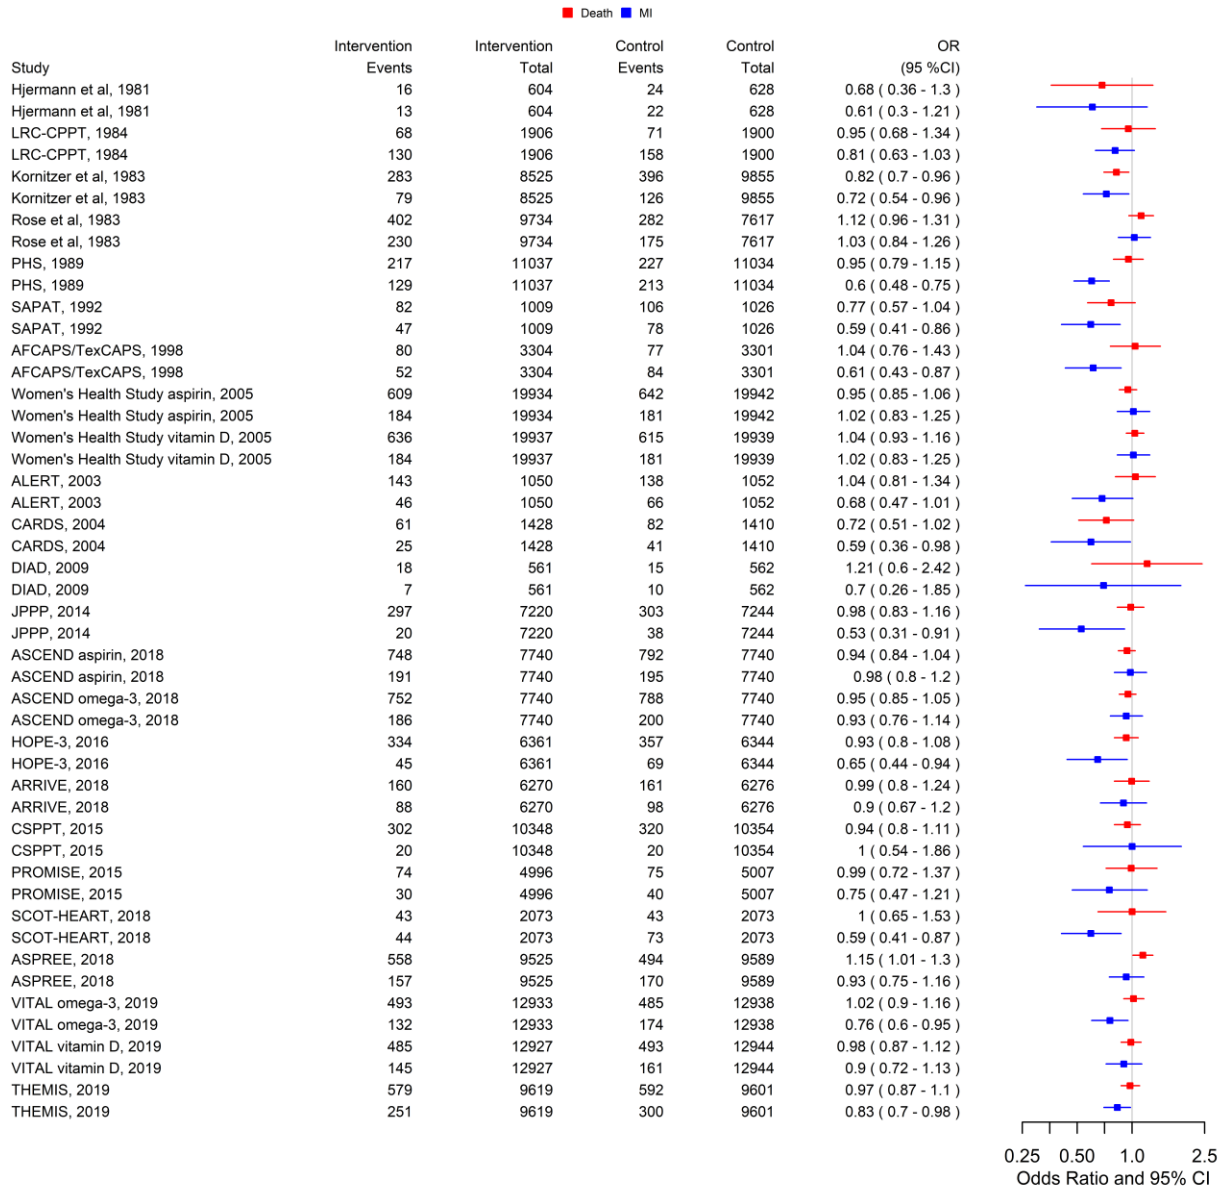

## 2C. Mixed primary/secondary prevention

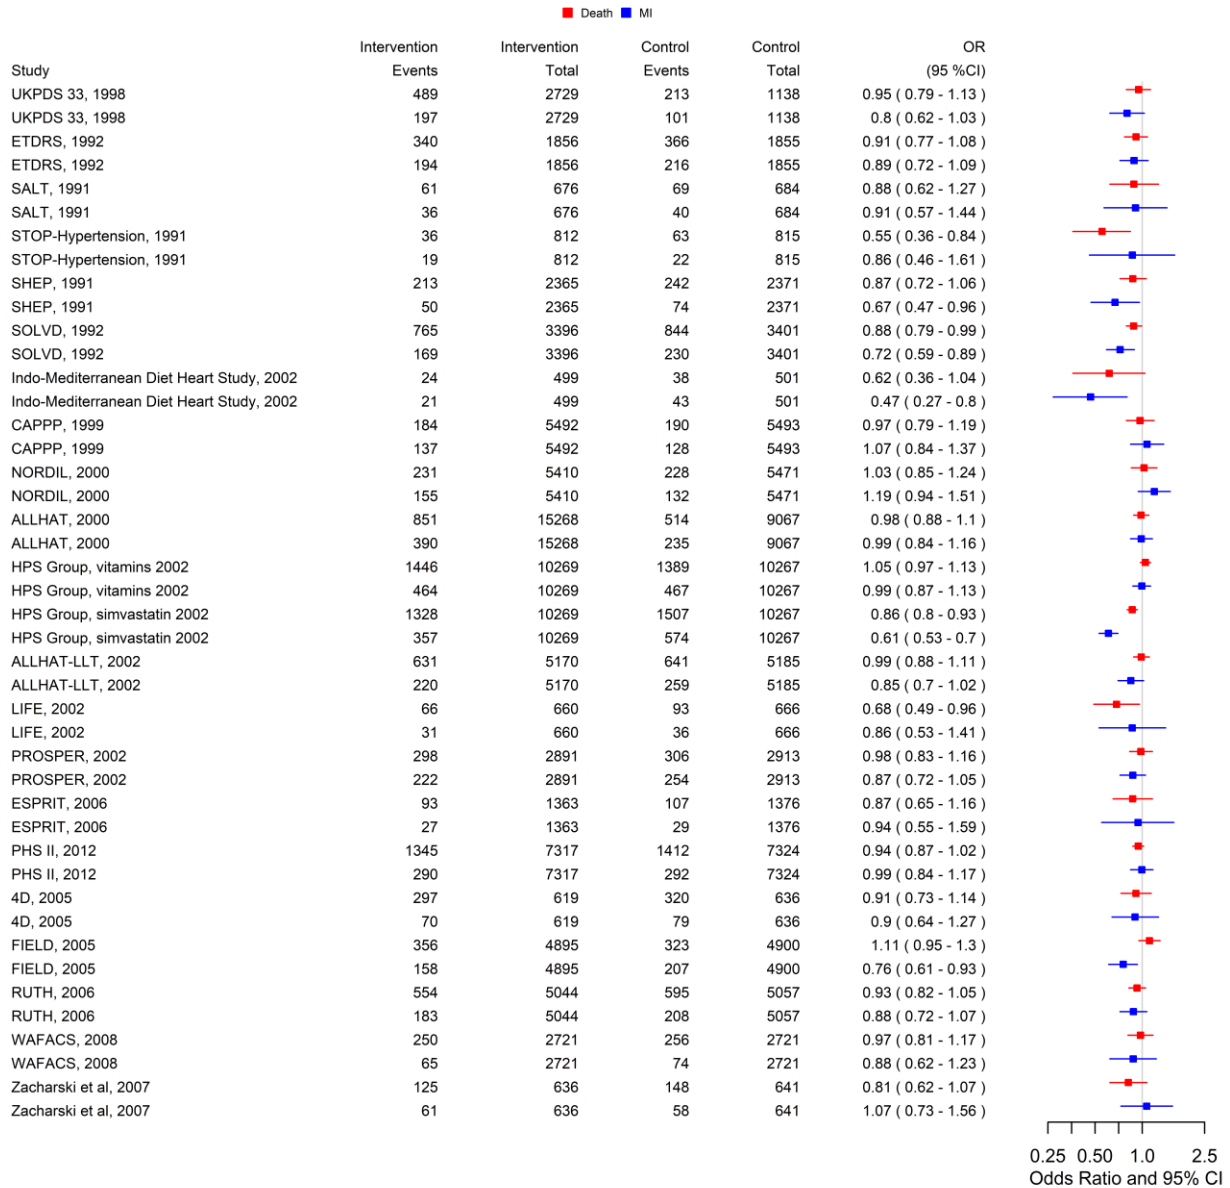

## 2C. (continued)

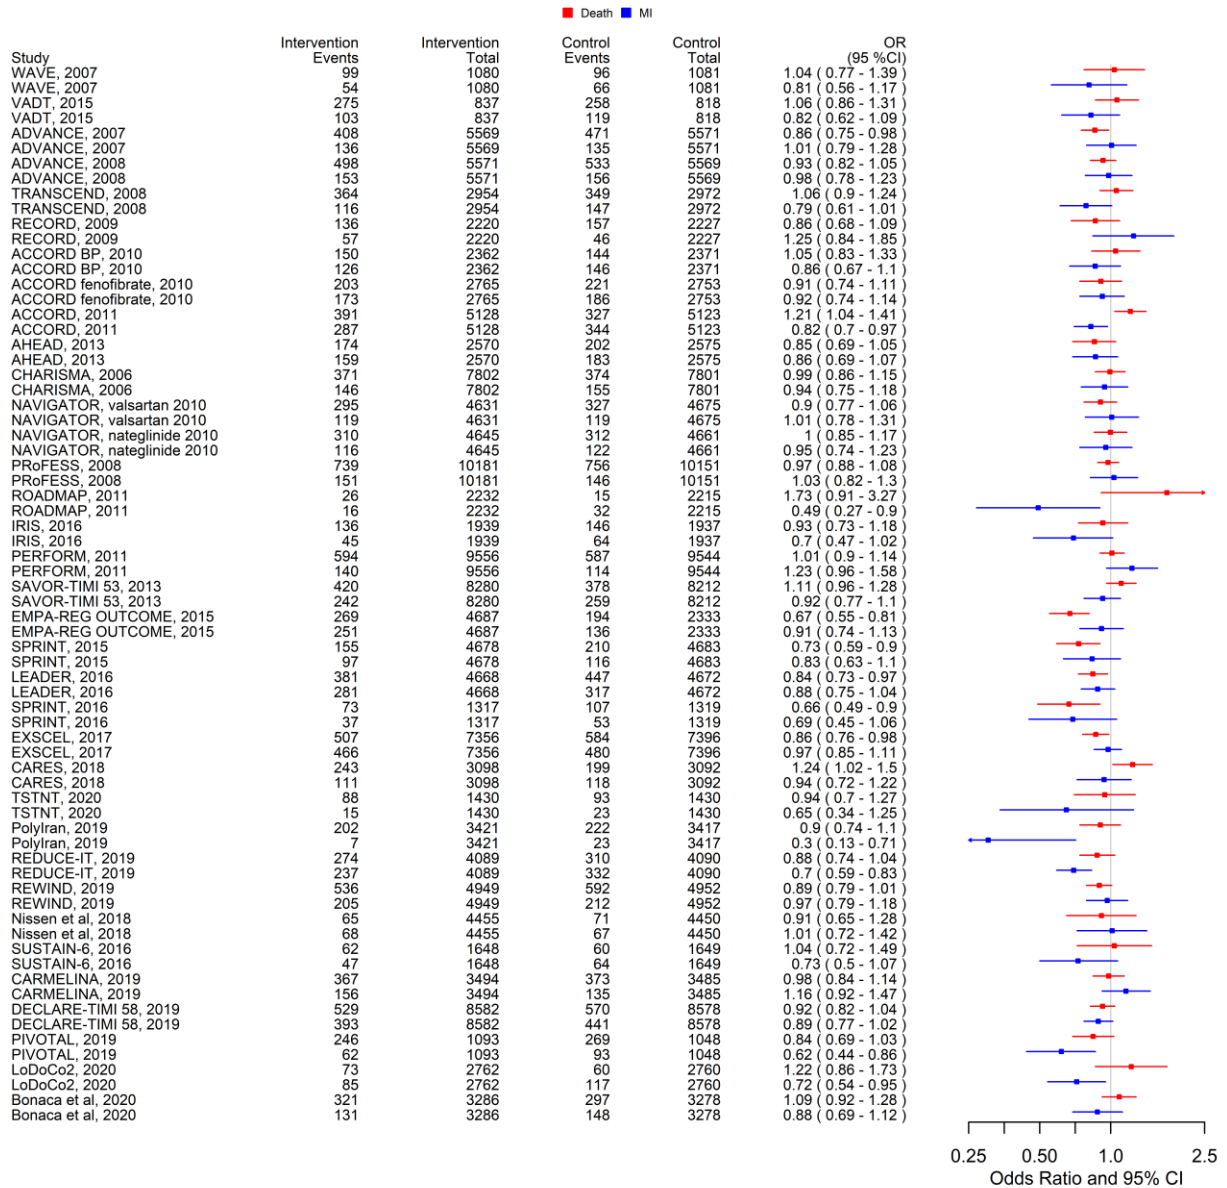

## 2D. Secondary prevention

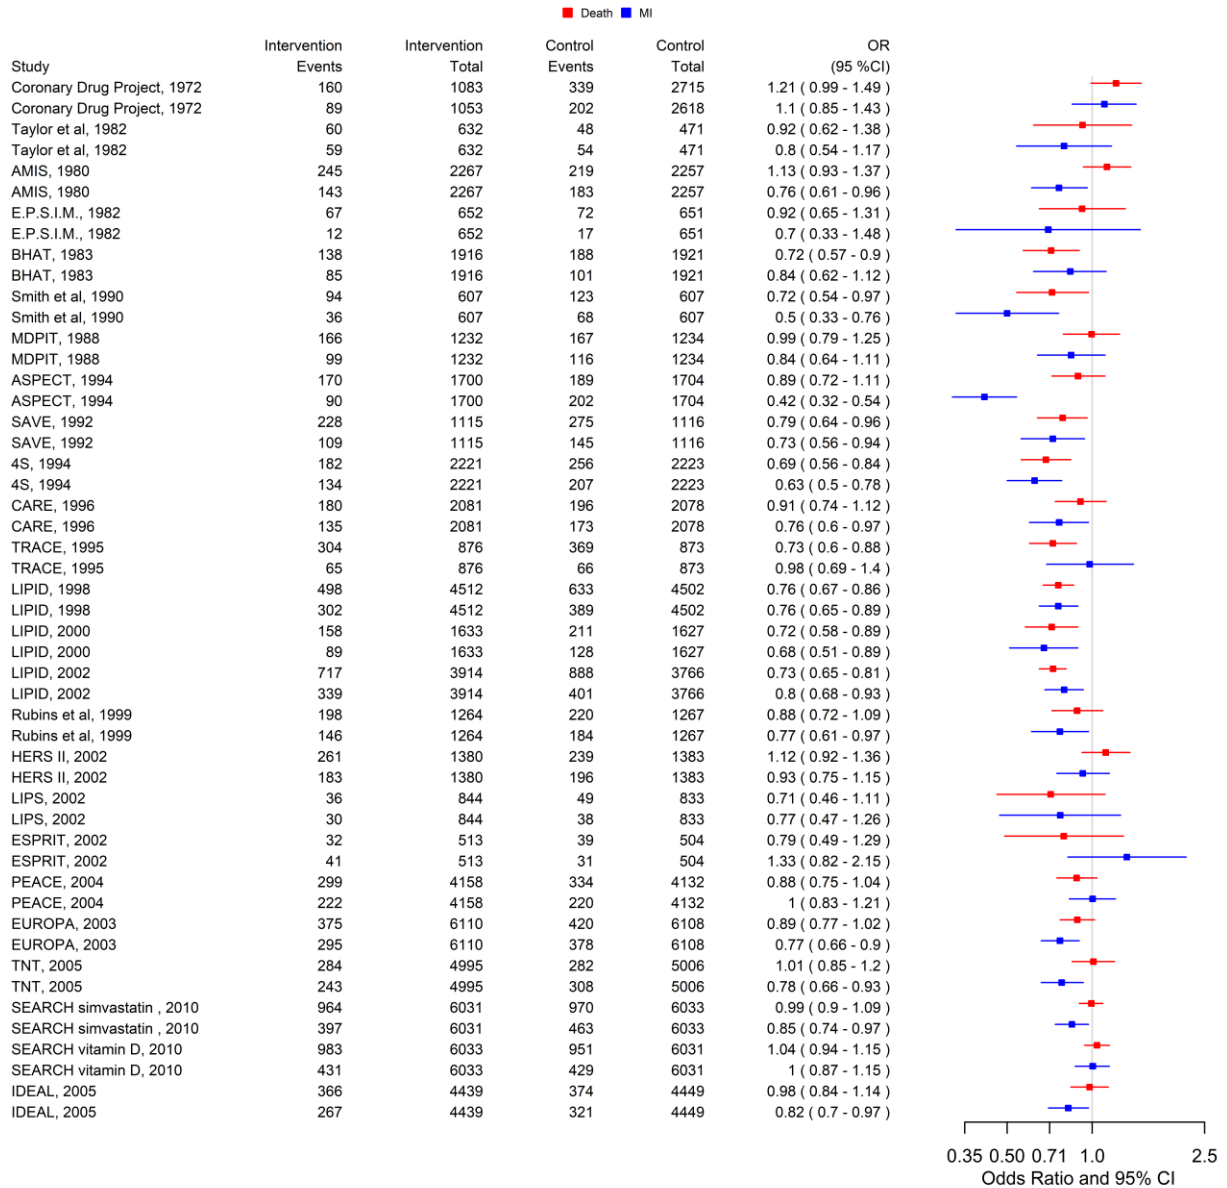

2D. (continued)

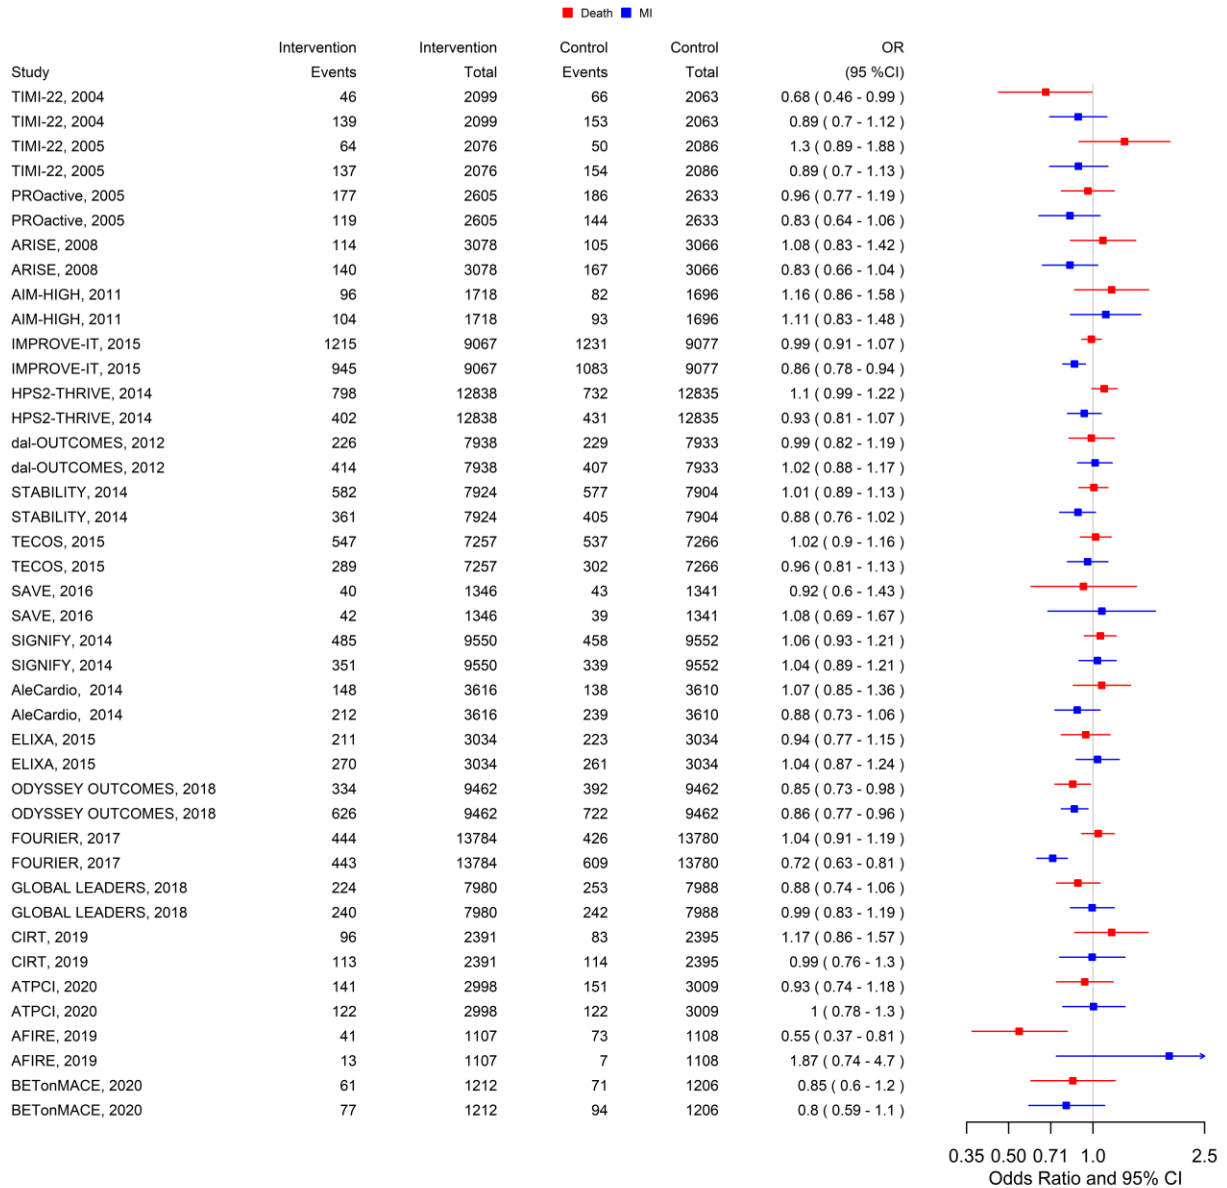



**eFigure 3.** Subgroup analysis by years of follow-up for the association between the logarithm of the odds ratios (OR) for surrogate endpoint of myocardial infarction (MI) and true endpoint of all-cause mortality

**3A. 2-3.9 years**

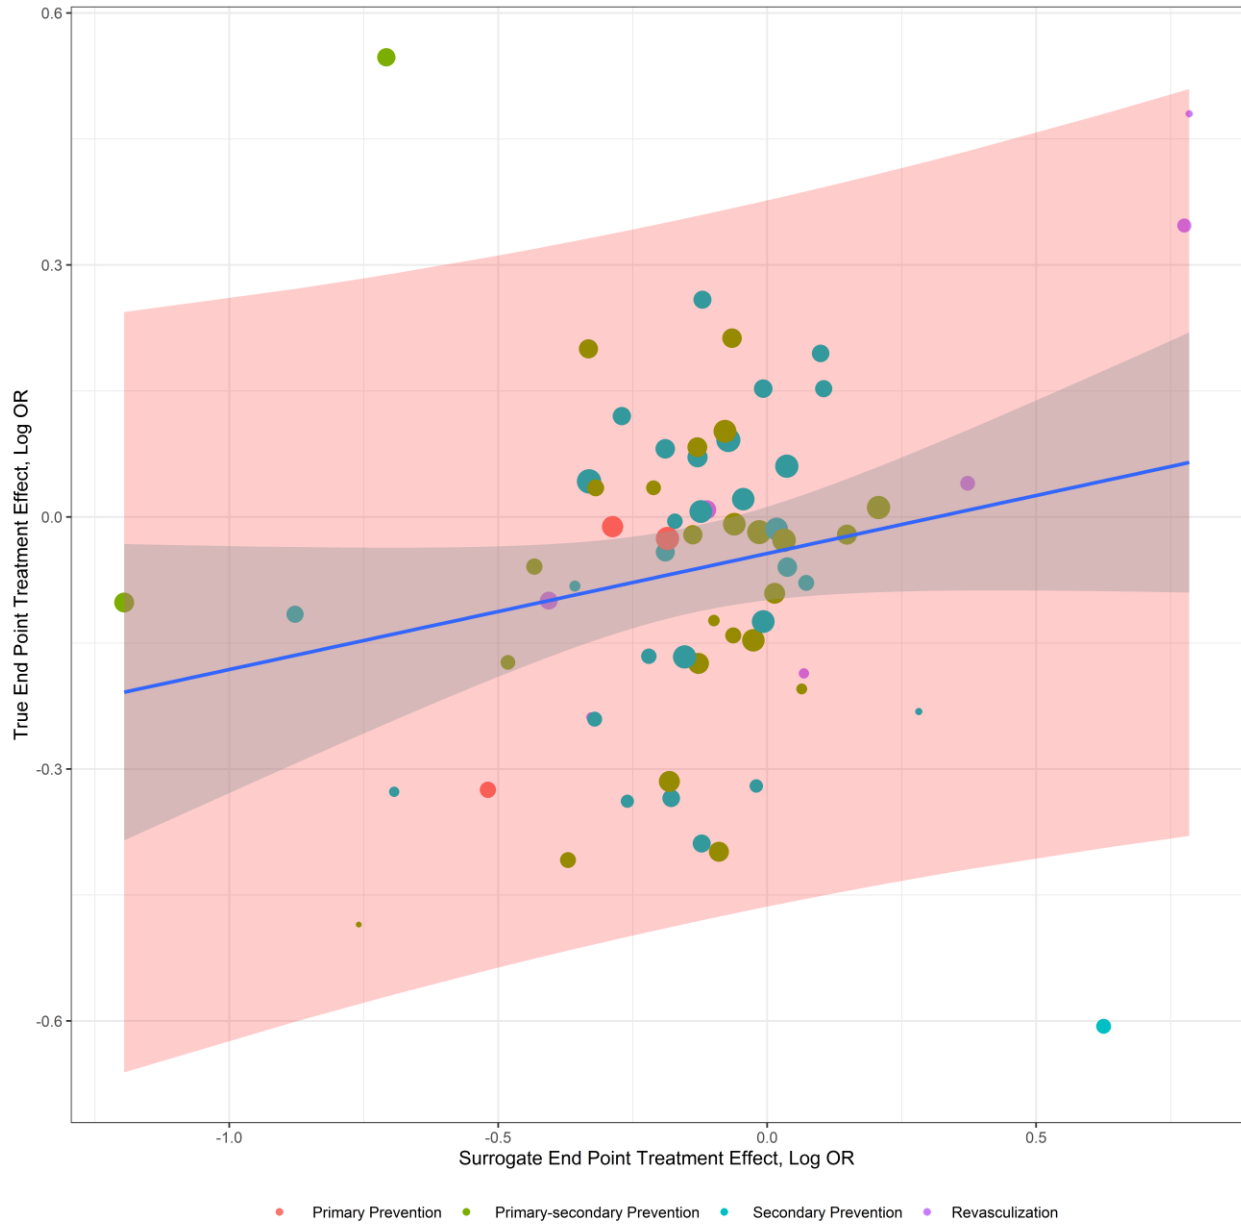

### 3B. 4-5.9 years

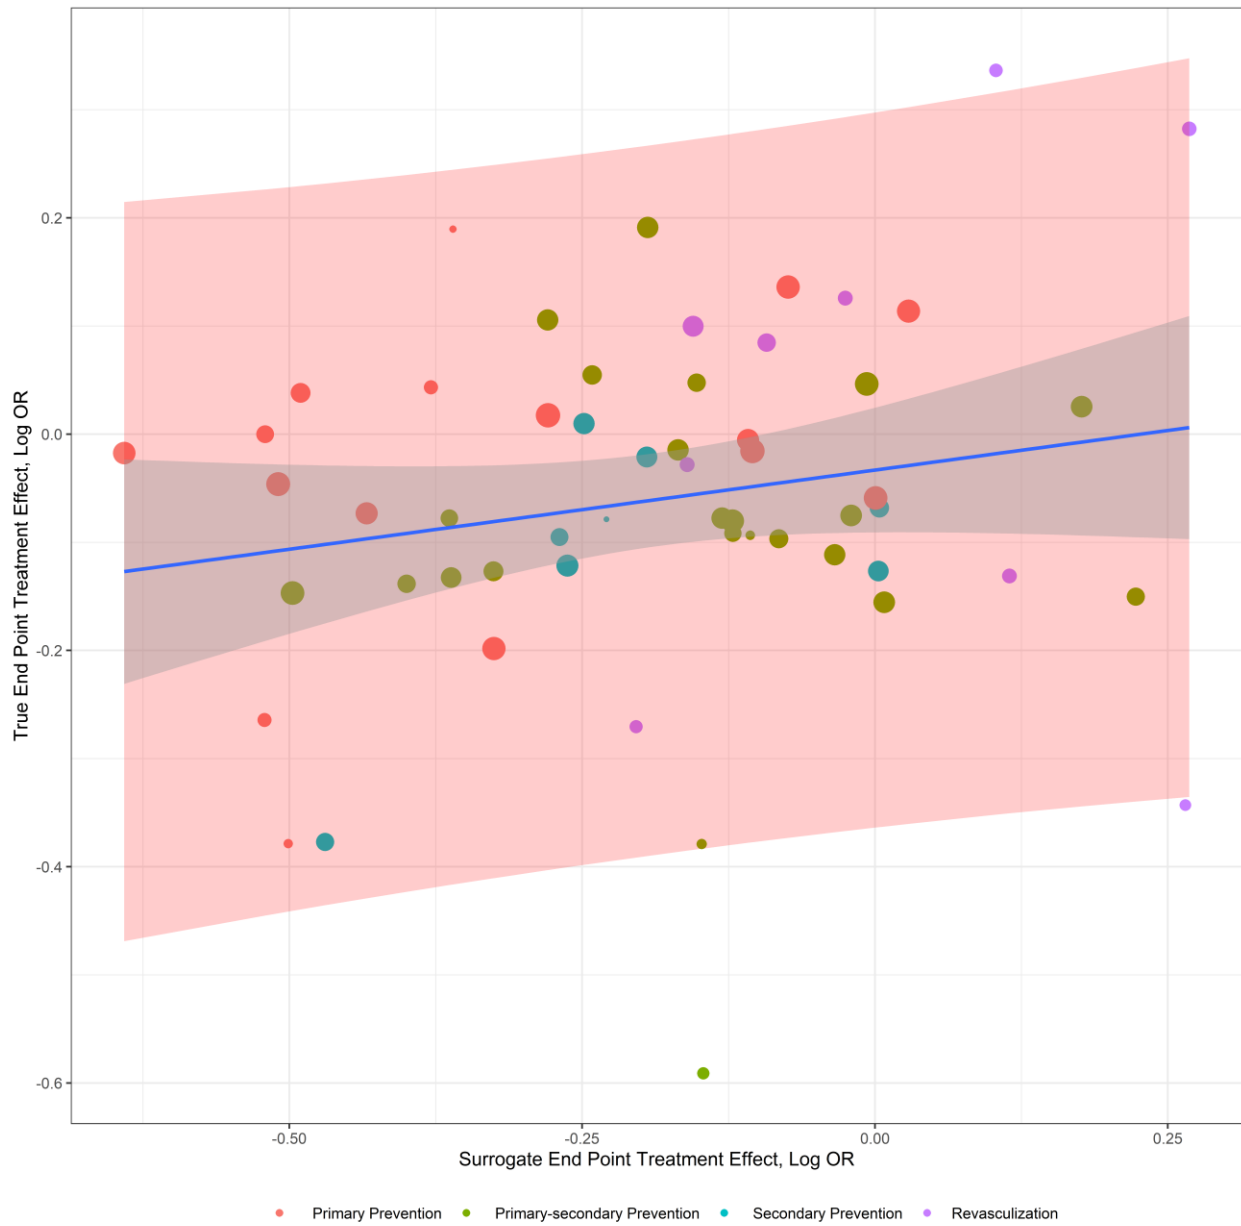

### 3C. $\geq 6$ years

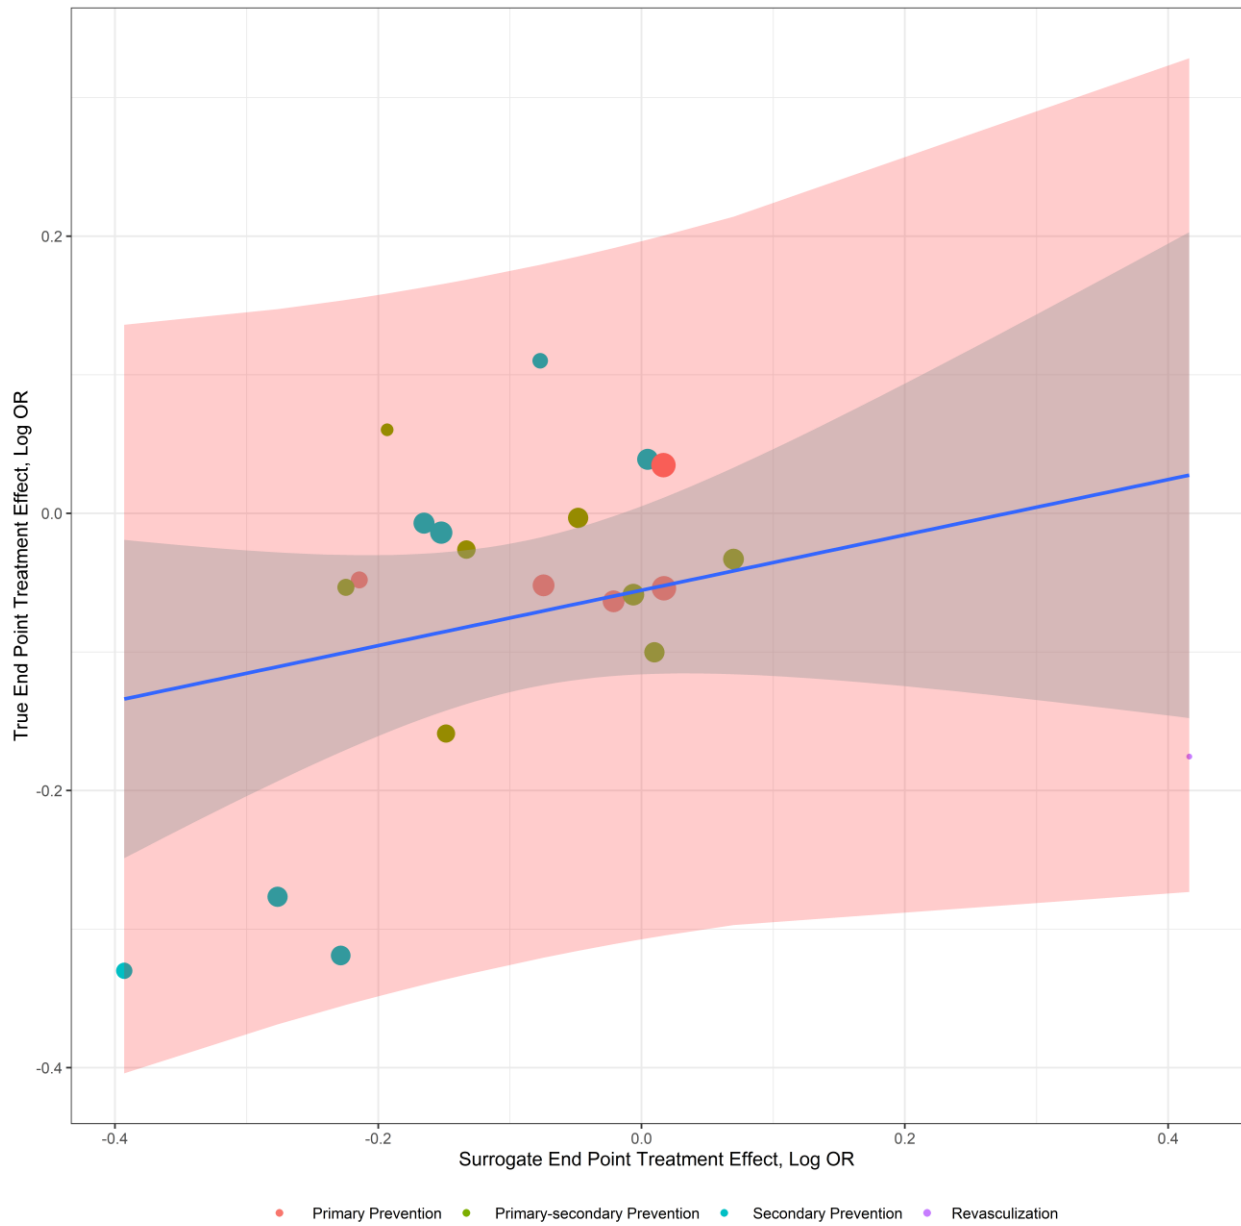

**eFigure 4.** Subgroup analysis by type of control arm for the association between the logarithm of the odds ratios (OR) for surrogate endpoint of myocardial infarction (MI) and true endpoint of all-cause mortality

**4A. Placebo**

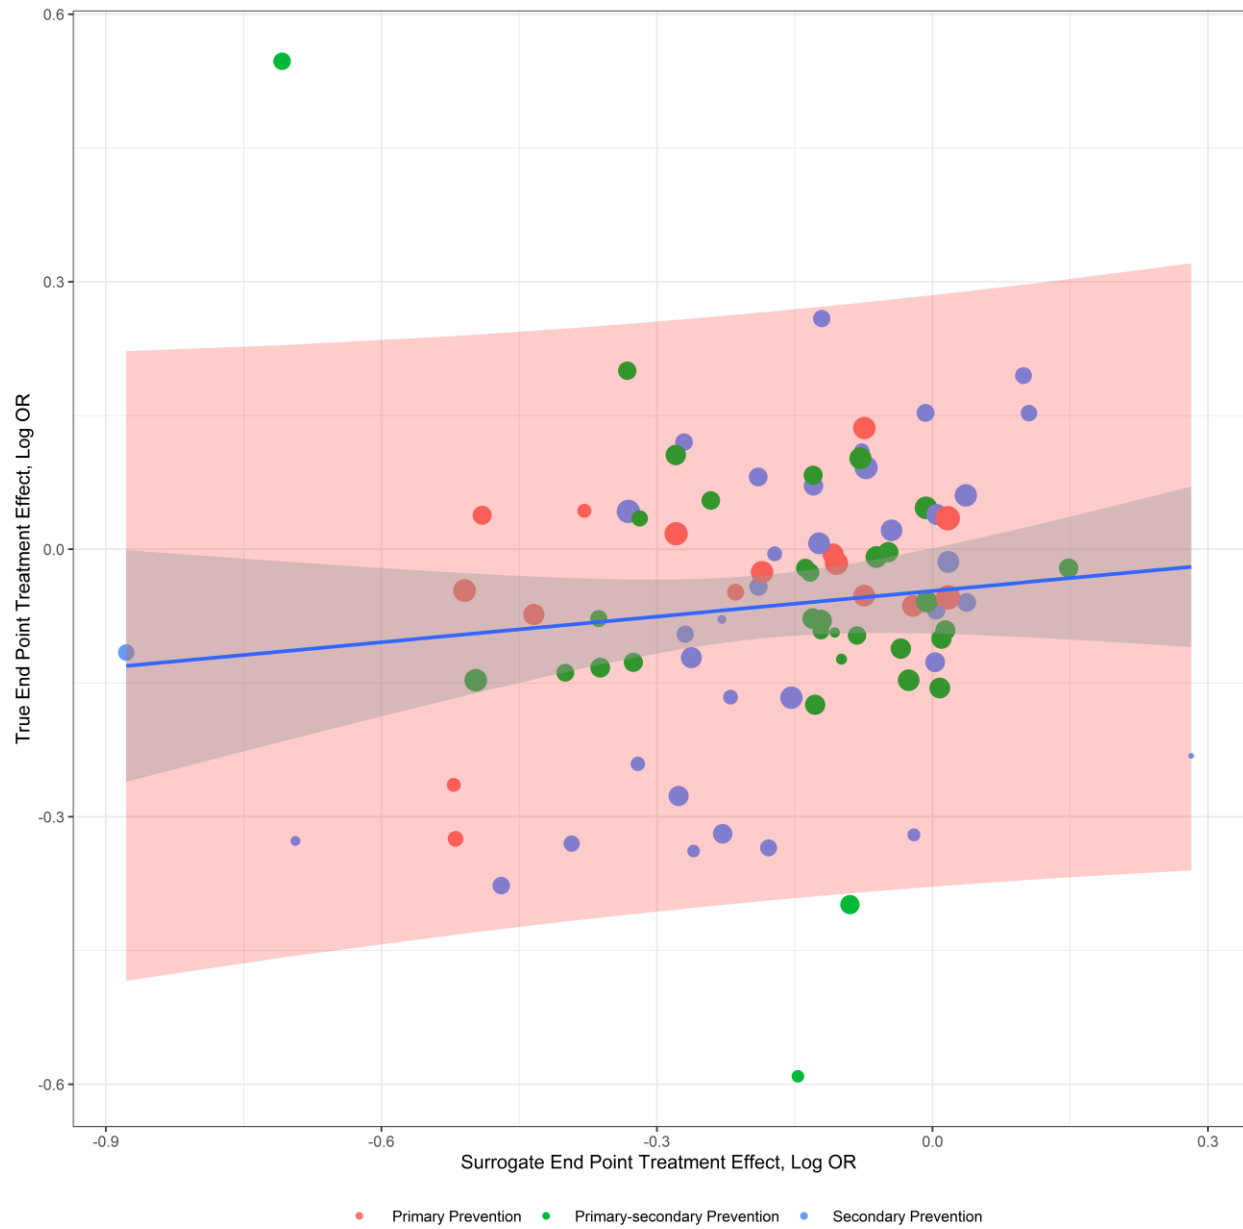

## 4B. Active control

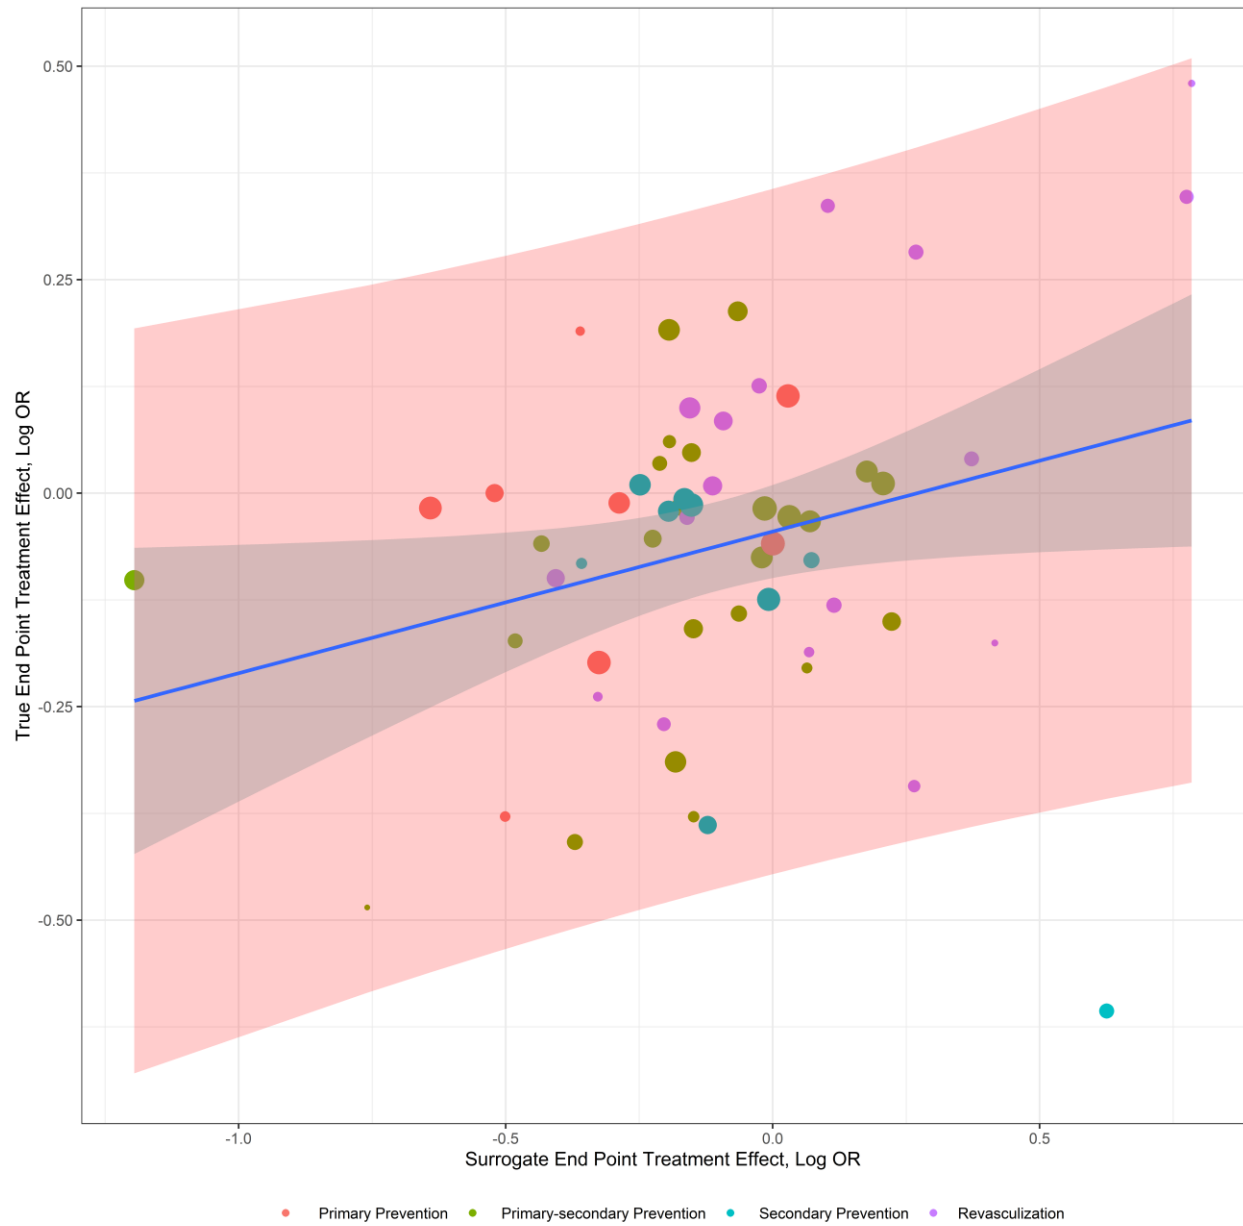

## **eAppendix. Search Strategy**

### **Pubmed**

("cardiovascular events"[All Fields] OR "cardiovascular event"[All Fields]) OR (("myocardial infarction"[All Fields] OR "myocardial infarction"[All Fields]) AND (("death"[MeSH Terms] OR "death"[All Fields]) OR ("death"[MeSH Terms] OR "death"[All Fields] OR "deaths"[All Fields]) OR ("mortality"[Subheading] OR "mortality"[All Fields] OR "mortality"[MeSH Terms]) OR ("mortality"[MeSH Terms] OR "mortality"[All Fields] OR "mortalities"[All Fields]) OR fatal[All Fields] OR fatalities[All Fields])) AND ("N Engl J Med"[Journal] OR "Lancet"[Journal] OR "JAMA"[Journal]) AND (Randomized Controlled Trial[ptyp] AND ("1945/01/01"[PDAT] : "2020/12/31"[PDAT])) AND (Randomized Controlled Trial[ptyp] AND ("1945/01/01"[PDAT] : "2020/12/31"[PDAT]))

eTable 1. Trial Characteristics

| Trial name, publication date           | Year of First Patient Enrollment | Investigational arm                                   | Control arm                            | MI definition                                                           | Investigational arm, N | Control arm, N | Median follow-up, years |
|----------------------------------------|----------------------------------|-------------------------------------------------------|----------------------------------------|-------------------------------------------------------------------------|------------------------|----------------|-------------------------|
| <b>Revascularization trials (N=17)</b> |                                  |                                                       |                                        |                                                                         |                        |                |                         |
| RITA-1, 1998                           | 1988                             | Percutaneous transluminal coronary angioplasty (PTCA) | Coronary artery bypass grafting (CABG) | WHO definition <sup>1</sup>                                             | 510                    | 501            | 6.5                     |
| RITA-2, 1997                           | 1992                             | PTCA                                                  | Optimal medical therapy (OMT)          | WHO definition                                                          | 504                    | 514            | 2.7                     |
| RITA-3, 2005                           | 1997                             | Early invasive strategy                               | Conservative strategy                  | WHO definition                                                          | 895                    | 915            | 5                       |
| COURAGE, 2007                          | 1999                             | Percutaneous coronary intervention (PCI) and OMT      | OMT                                    | COURAGE definition <sup>2</sup>                                         | 1149                   | 1138           | 4.6                     |
| OAT, 2006                              | 2000                             | PCI and OMT                                           | OMT                                    | OAT definition <sup>3</sup>                                             | 1082                   | 1084           | 3                       |
| BARI 2D, 2009                          | 2001                             | Revascularization and OMT                             | OMT                                    | BARI 2D trial definition <sup>4</sup>                                   | 1176                   | 1192           | 5.3                     |
| ROOBY-FS, 2017                         | 2002                             | Off pump CABG                                         | On pump CABG                           | Universal definition of myocardial infarction (UDMI), 2007 <sup>5</sup> | 1104                   | 1099           | 5                       |
| FREEDOM, 2012                          | 2005                             | PCI                                                   | CABG                                   | FREEDOM Trial definition <sup>6</sup>                                   | 953                    | 947            | 3.8                     |
| CORONARY, 2016                         | 2006                             | Off pump CABG                                         | On pump CABG                           | ACC definition clinical outcomes for patients with ACS <sup>7</sup>     | 2375                   | 2377           | 4.8                     |
| SORT OUT III, 2014                     | 2006                             | Zotarolimus-eluting stent                             | Sirolimus eluting stent                | ICD-10 Diagnosis Code I21.9                                             | 1162                   | 1170           | 5                       |

|                      |      |                                                            |                                         |                                                               |      |      |     |
|----------------------|------|------------------------------------------------------------|-----------------------------------------|---------------------------------------------------------------|------|------|-----|
| EXAMINATION, 2016    | 2008 | Everolimus-eluting stent                                   | Bare-metal stent                        | WHO extended definition <sup>8</sup>                          | 751  | 747  | 5   |
| NORSTENT, 2016       | 2008 | Drug-eluting stent                                         | Bare-metal stent                        | Third UDMI, 2012 <sup>9</sup>                                 | 4504 | 4509 | 4.9 |
| EXCEL, 2019          | 2010 | PCI                                                        | CABG                                    | EXCEL trial definition <sup>10</sup>                          | 948  | 957  | 5   |
| DANAMI 3-DEFER, 2016 | 2011 | Deferred PCI                                               | Standard PCI                            | Third UDMI, 2012                                              | 603  | 612  | 3.5 |
| ISCHEMIA, 2020       | 2012 | Early invasive angiography and OMT                         | OMT                                     | ISCHEMIA trial definition (modified Third UDMI) <sup>11</sup> | 2588 | 2591 | 3.2 |
| COMPLETE, 2019       | 2013 | Complete revascularization including non-culprit lesion(s) | Revascularization of culprit lesion (s) | Third UDMI, 2012                                              | 2016 | 2025 | 3   |
| REGROUP, 2019        | 2014 | Endoscopic vein-graft harvesting CABG                      | Open vein-graft harvesting CABG         | Third UDMI                                                    | 576  | 574  | 2.8 |

#### Primary prevention trials (N= 24)

|                       |      |                                                                    |                  |                |      |      |     |
|-----------------------|------|--------------------------------------------------------------------|------------------|----------------|------|------|-----|
| Hjermann et al, 1981  | 1972 | Smoking cessation and dietary consultation                         | Standard of care | WHO definition | 604  | 628  | 5   |
| LRC-CPPT, 1984        | 1973 | Cholestyramine                                                     | Placebo          | WHO definition | 1906 | 1900 | 7.4 |
| Kornitzer et al, 1983 | 1974 | Smoking cessation, weight loss, exercise, and dietary consultation | Standard of care | WHO definition | 8525 | 9855 | 5.5 |
| Rose et al, 1983      | 1974 | Smoking cessation, weight loss, exercise, and dietary consultation | Standard of care | WHO definition | 9734 | 7617 | 5.5 |



|                      |      |                                                  |                        |                                                                             |       |       |      |
|----------------------|------|--------------------------------------------------|------------------------|-----------------------------------------------------------------------------|-------|-------|------|
| PHS, 1989            | 1981 | Aspirin                                          | Placebo                | WHO definition                                                              | 11037 | 11034 | 5    |
| SAPAT, 1992          | 1985 | Aspirin and sotalol                              | Placebo and sotalol    | WHO definition                                                              | 1009  | 1026  | 4.2  |
| AFCAPS/TexCAPS, 1998 | 1990 | Lovastatin                                       | Placebo                | WHO definition                                                              | 3304  | 3301  | 5.2  |
| WHS, 2005            | 1992 | Aspirin                                          | Placebo                | WHO definition                                                              | 19934 | 19942 | 10.1 |
| WHS, 2005            | 1992 | Vitamin E                                        | Placebo                | WHO definition                                                              | 19937 | 19939 | 10.1 |
| ALERT, 2003          | 1996 | Fluvastatin                                      | Placebo                | WHO definition                                                              | 1050  | 1052  | 5.1  |
| CARDS, 2004          | 1997 | Atorvastatin                                     | Placebo                | WHO definition                                                              | 1428  | 1410  | 3.9  |
| DIAD, 2009           | 2000 | Myocardial perfusion imaging                     | Standard of care       | Joint ESC/ACC definition <sup>12</sup>                                      | 561   | 562   | 4.8  |
| JPPP, 2014           | 2005 | Aspirin                                          | Standard of care       | AHA/ESC epidemiology and clinical research studies definition <sup>13</sup> | 7220  | 7244  | 5    |
| ASCEND, 2018         | 2005 | Aspirin                                          | Placebo                | Joint ESC/ACC definition                                                    | 7740  | 7740  | 7.4  |
| ASCEND, 2018         | 2005 | Omega-3 fatty acid                               | Placebo                | Joint ESC/ACC definition                                                    | 7740  | 7740  | 7.4  |
| HOPE-3, 2016         | 2007 | Rosuvastatin                                     | Placebo                | Third UDMI, 2012                                                            | 6361  | 6344  | 5.6  |
| ARRIVE, 2018         | 2007 | Aspirin                                          | Placebo                | WHO definition                                                              | 6270  | 6276  | 5    |
| CSPPT, 2015          | 2008 | Folic acid and enalapril                         | Enalapril              | Joint ESC/ACC definition                                                    | 10348 | 10354 | 4.5  |
| PROMISE, 2015        | 2010 | Coronary computed tomographic angiography (CCTA) | Functional stress test | UDMI, 2007                                                                  | 4996  | 5007  | 2.1  |

|                                                   |      |                                 |                           |                          |       |       |     |
|---------------------------------------------------|------|---------------------------------|---------------------------|--------------------------|-------|-------|-----|
| SCOT-HEART, 2018                                  | 2010 | CCTA                            | Standard of care          | UDMI, 2007               | 2073  | 2073  | 4.8 |
| ASPREE, 2018                                      | 2010 | Aspirin                         | Placebo                   | Joint ESC/ACC definition | 9525  | 9589  | 4.7 |
| VITAL, 2019                                       | 2011 | Omega-3 fatty acid              | Placebo                   | Third UDMI, 2012         | 12933 | 12938 | 5.3 |
| VITAL, 2019                                       | 2011 | Vitamin D                       | Placebo                   | Third UDMI, 2012         | 12927 | 12944 | 5.3 |
| THEMIS, 2019                                      | 2014 | Ticagrelor and aspirin          | Aspirin and placebo       | Third UDMI, 2012         | 9619  | 9601  | 3.3 |
| <b>Mixed primary/secondary prevention (N= 57)</b> |      |                                 |                           |                          |       |       |     |
| UKPDS 33, 1998                                    | 1977 | Intensive glycemic control      | Standard glycemic control | WHO definition           | 2729  | 1138  | 10  |
| ETDRS, 1992                                       | 1980 | Aspirin                         | Placebo                   | WHO definition           | 1856  | 1855  | 5   |
| SALT, 1991                                        | 1984 | Aspirin                         | Placebo                   | WHO definition           | 676   | 684   | 2.7 |
| STOP-Hypertension, 1991                           | 1985 | Active antihypertensive therapy | Placebo                   | WHO definition           | 812   | 815   | 4   |
| SHEP, 1991                                        | 1985 | Active antihypertensive therapy | Placebo                   | WHO definition           | 2365  | 2371  | 4.5 |
| SOLVD, 1992                                       | 1986 | Enalapril                       | Placebo                   | WHO definition           | 3396  | 3401  | 5   |
| Indo-Mediterranean Diet Heart Study, 2002         | 1989 | Dietary consultation            | Standard of care          | WHO definition           | 499   | 501   | 2   |
| CAPPP, 1999                                       | 1991 | Captopril                       | Beta blocker or diuretic  | WHO definition           | 5492  | 5493  | 6.1 |
| NORDIL, 2000                                      | 1992 | Diltiazem                       | Beta-blocker and diuretic | WHO definition           | 5410  | 5471  | 4.5 |
| ALLHAT, 2000                                      | 1994 | Chlorthalidone                  | Doxazosin                 | WHO definition           | 15268 | 9067  | 3.3 |
| HPS, 2002                                         | 1994 | Anti-oxidant vitamins           | Placebo                   | WHO definition           | 10269 | 10267 | 5   |
| HPS, 2002                                         | 1994 | Simvastatin                     | Placebo                   | WHO definition           | 10269 | 10267 | 5   |

|                  |      |                                           |                           |                                                        |      |      |      |
|------------------|------|-------------------------------------------|---------------------------|--------------------------------------------------------|------|------|------|
| ALLHAT-LLT, 2002 | 1994 | Pravastatin                               | Standard of care          | WHO definition                                         | 5170 | 5185 | 4.8  |
| LIFE, 2002       | 1995 | Losartan                                  | Atenolol                  | WHO definition                                         | 660  | 666  | 4.7  |
| PROSPER, 2002    | 1997 | Pravastatin                               | Placebo                   | WHO definition                                         | 2891 | 2913 | 3.2  |
| ESPRIT, 2006     | 1997 | Aspirin and dipyridamole                  | Aspirin                   | WHO definition                                         | 1363 | 1376 | 3.5  |
| PHS II, 2012     | 1997 | Multivitamin                              | Placebo                   | WHO definition                                         | 7317 | 7324 | 11.2 |
| 4D, 2005         | 1998 | Atorvastatin                              | Placebo                   | WHO definition                                         | 619  | 636  | 4    |
| FIELD, 2005      | 1998 | Fenofibrate                               | Placebo                   | WHO definition                                         | 4895 | 4900 | 5    |
| RUTH, 2006       | 1998 | Raloxifene                                | Placebo                   | WHO definition                                         | 5044 | 5057 | 5.6  |
| WAFACS, 2008     | 1998 | Vitamins B6, B9, and B12                  | Placebo                   | WHO definition                                         | 2721 | 2721 | 7.3  |
| FeAST, 2007      | 1999 | Phlebotomy                                | Standard of care          | Joint ESC/ACC definition                               | 636  | 641  | 3.5  |
| WAVE, 2007       | 2000 | Anti-coagulation and anti-platelet        | Anti-platelet             | WHO definition                                         | 1080 | 1081 | 2.9  |
| VADT, 2015       | 2000 | Intensive glycemic control                | Standard glycemic control | ICD-9 diagnosis code 410.x                             | 837  | 818  | 9.8  |
| ADVANCE, 2007    | 2001 | Perindopril-indapamide                    | Placebo                   | WHO definition                                         | 5569 | 5571 | 4.3  |
| ADVANCE, 2008    | 2001 | Gliclazide for intensive glycemic control | Standard glycemic control | WHO definition                                         | 5571 | 5569 | 4.3  |
| TRANSCEND, 2008  | 2001 | Telmisartan                               | Placebo                   | ACC definition clinical outcomes for patients with ACS | 2954 | 2972 | 4.6  |
| RECORD, 2009     | 2001 | Rosiglitazone                             | Standard of care          | Joint ESC/ACC definition                               | 2220 | 2227 | 5.5  |

|                        |      |                                                         |                                 |                                 |       |       |     |
|------------------------|------|---------------------------------------------------------|---------------------------------|---------------------------------|-------|-------|-----|
| ACCORD, 2010           | 2001 | Intensive blood pressure control                        | Standard blood pressure control | ACCORD definition <sup>14</sup> | 2362  | 2371  | 4.7 |
| ACCORD, 2010           | 2001 | Fenofibrate                                             | Placebo                         | ACCORD definition               | 2765  | 2753  | 4.7 |
| ACCORD, 2011           | 2001 | Intensive glycemic control                              | Standard glycemic control       | ACCORD definition               | 5128  | 5123  | 4.7 |
| Look AHEAD, 2013       | 2001 | Decreased caloric intake and increase physical activity | Standard of care                | UDMI, 2007                      | 2570  | 2575  | 9.6 |
| CHARISMA, 2006         | 2002 | Clopidogrel and Aspirin                                 | Placebo and Aspirin             | Joint ESC/ACC definition        | 7802  | 7801  | 2.3 |
| NAVIGATOR, 2010        | 2002 | Valsartan                                               | Placebo                         | UDMI, 2007                      | 4631  | 4675  | 6.5 |
| NAVIGATOR, 2010        | 2002 | Nateglinide                                             | Placebo                         | UDMI, 2007                      | 4645  | 4661  | 6.5 |
| PRoFESS, 2008          | 2003 | Aspirin and dipyridamole                                | Clopidogrel                     | WHO definition                  | 10181 | 10151 | 2.5 |
| ROADMAP, 2011          | 2004 | Olmesartan                                              | Placebo                         | Joint ESC/ACC definition        | 2232  | 2215  | 3.2 |
| IRIS, 2016             | 2005 | Pioglitazone                                            | Placebo                         | Third UDMI, 2012                | 1939  | 1937  | 4.8 |
| PERFORM, 2011          | 2006 | Terutroban                                              | Aspirin                         | UDMI, 2007                      | 9556  | 9544  | 2.4 |
| SAVOR-TIMI 53, 2013    | 2010 | Saxagliptin                                             | Placebo                         | UDMI, 2007                      | 8280  | 8212  | 2.1 |
| EMPA-REG OUTCOME, 2015 | 2010 | Empagliflozin                                           | Placebo                         | UDMI, 2007                      | 4687  | 2333  | 3.1 |
| SPRINT, 2015           | 2010 | Intensive blood pressure control                        | Standard blood pressure control | UDMI, 2007                      | 4678  | 4683  | 3.3 |
| LEADER, 2016           | 2010 | Liraglutide                                             | Placebo                         | UDMI, 2007                      | 4668  | 4672  | 3.8 |
| SPRINT, 2016           | 2010 | Intensive blood pressure control                        | Standard blood pressure control | UDMI, 2007                      | 1317  | 1319  | 3.1 |
| EXSCEL, 2017           | 2010 | Exenatide                                               | Placebo                         | UDMI, 2007                      | 7356  | 7396  | 3.2 |
| CARES, 2018            | 2010 | Febuxostat                                              | Allopurinol                     | UDMI, 2007                      | 3098  | 3092  | 2.7 |
| Amarenco et al, 2020   | 2010 | Low target LDL                                          | High target LDL                 | UDMI, 2007                      | 1430  | 1430  | 3.5 |

|                       |      |                                         |                                       |                           |      |      |     |
|-----------------------|------|-----------------------------------------|---------------------------------------|---------------------------|------|------|-----|
| PolyIran, 2019        | 2011 | Polypill tablet                         | Non-pharmacologic intervention        | ICD-10 diagnosis code I21 | 3421 | 3417 | 3   |
| REDUCE-IT, 2019       | 2011 | Icosapent ethyl                         | Placebo                               | UDMI, 2007                | 4089 | 4090 | 4.9 |
| REWIND, 2019          | 2011 | Dulaglutide                             | Placebo                               | UDMI, 2007                | 4949 | 4952 | 5.4 |
| Nissen et al, 2018    | 2012 | Naltrexone and bupropion                | Placebo                               | UDMI, 2007                | 4455 | 4450 | 2.3 |
| SUSTAIN-6, 2016       | 2013 | Semaglutide                             | Placebo                               | Third UDMI, 2012          | 1648 | 1649 | 2.1 |
| CARMELINA, 2019       | 2013 | Linagliptin                             | Placebo                               | UDMI, 2007                | 3494 | 3485 | 2.2 |
| DECLARE-TIMI 58, 2019 | 2013 | Dapagliflozin                           | Placebo                               | Third UDMI, 2012          | 8582 | 8578 | 4.2 |
| PIVOTAL, 2019         | 2013 | High-dose iron administered proactively | Low-dose iron administered reactively | Third UDMI, 2012          | 1093 | 1048 | 2.1 |
| LoDoCo2, 2020         | 2014 | Colchicine                              | Placebo                               | Third UDMI, 2012          | 2762 | 2760 | 2.4 |
| VOYAGER PAD, 2020     | 2015 | Rivaroxaban and aspirin                 | Placebo and aspirin                   | Third UDMI, 2012          | 3286 | 3278 | 2.3 |

### Secondary prevention (N= 46)

|                             |      |                                        |         |                                                     |      |      |     |
|-----------------------------|------|----------------------------------------|---------|-----------------------------------------------------|------|------|-----|
| Coronary Drug Project, 1972 | 1966 | Dextrothyroxine                        | Placebo | Diseases of the Heart and Blood Vessels, ed 6, 1964 | 1053 | 2618 | 3   |
| Taylor et al, 1982          | 1973 | Oxprenolol                             | Placebo | WHO definition                                      | 632  | 471  | 4   |
| AMIS, 1980                  | 1975 | Aspirin                                | Placebo | WHO definition                                      | 2267 | 2257 | 3.2 |
| EPSIM, 1982                 | 1975 | Oral anticoagulation (multiple agents) | Aspirin | WHO definition                                      | 652  | 651  | 2.4 |
| BHAT, 1983                  | 1978 | Propranolol hydrochloride              | Placebo | WHO definition                                      | 1916 | 1921 | 2.1 |
| Smith et al, 1990           | 1983 | Warfarin                               | Placebo | WHO definition                                      | 607  | 607  | 3.1 |

|                    |      |                                       |                         |                                                        |      |      |     |
|--------------------|------|---------------------------------------|-------------------------|--------------------------------------------------------|------|------|-----|
| MDPIT, 1988        | 1983 | Diltiazem                             | Placebo                 | WHO definition                                         | 1232 | 1234 | 2.1 |
| ASPECT, 1994       | 1986 | Anti-coagulation (multiple agents)    | Placebo                 | WHO definition                                         | 1700 | 1704 | 3.1 |
| SAVE, 1992         | 1987 | Captopril                             | Placebo                 | WHO definition                                         | 1115 | 1116 | 3.5 |
| 4S, 1994           | 1988 | Simvastatin                           | Placebo                 | WHO definition                                         | 2221 | 2223 | 5.4 |
| CARE, 1996         | 1989 | Pravastatin                           | Placebo                 | WHO definition                                         | 2081 | 2078 | 5   |
| TRACE, 1995        | 1990 | Trandolapril                          | Placebo                 | WHO definition                                         | 876  | 873  | 3.1 |
| LIPID, 1998        | 1990 | Pravastatin                           | Placebo                 | WHO definition                                         | 4512 | 4502 | 6.1 |
| LIPID, 2000        | 1990 | Pravastatin                           | Placebo                 | WHO definition                                         | 1633 | 1627 | 6   |
| LIPID, 2002        | 1990 | Pravastatin                           | Placebo                 | WHO definition                                         | 3914 | 3766 | 8   |
| Rubins et al, 1999 | 1991 | Gemfibrozil                           | Placebo                 | WHO definition                                         | 1264 | 1267 | 5.1 |
| HERS II, 2002      | 1994 | Estrogen and progesterone replacement | Placebo                 | WHO definition                                         | 1380 | 1383 | 6.8 |
| LIPS, 2002         | 1996 | Fluvastatin                           | Placebo                 | WHO definition                                         | 844  | 833  | 3.9 |
| ESPRIT, 2002       | 1996 | Estradiol valerate                    | Placebo                 | WHO definition                                         | 513  | 504  | 2   |
| PEACE, 2004        | 1996 | Trandolapril                          | Placebo                 | ACC definition clinical outcomes for patients with ACS | 4158 | 4132 | 4.8 |
| EUROPA, 2003       | 1997 | Perindopril                           | Placebo                 | Joint ESC/ACC definition                               | 6110 | 6108 | 4.2 |
| TNT, 2005          | 1998 | Atorvastatin 80mg daily               | Atorvastatin 10mg daily | WHO definition                                         | 4995 | 5006 | 4.9 |
| SEARCH, 2010       | 1998 | Simvastatin 80mg daily                | Simvastatin 20mg daily  | WHO definition                                         | 6031 | 6033 | 6.7 |

|                        |      |                           |                        |                                                        |       |       |     |
|------------------------|------|---------------------------|------------------------|--------------------------------------------------------|-------|-------|-----|
| SEARCH, 2010           | 1998 | Vitamins B9 and B12       | Placebo                | WHO definition                                         | 6033  | 6031  | 6.7 |
| IDEAL, 2005            | 1999 | Atorvastatin              | Simvastatin            | Joint ESC/ACC definition                               | 4439  | 4449  | 4.8 |
| PROVE IT-TIMI 22, 2004 | 2000 | Atorvastatin 80mg daily   | Pravastatin 40mg daily | ACC definition clinical outcomes for patients with ACS | 2099  | 2063  | 2   |
| PROVE IT-TIMI 22, 2005 | 2000 | Gatifloxacin              | Placebo                | ACC definition clinical outcomes for patients with ACS | 2076  | 2086  | 2   |
| PROactive, 2005        | 2001 | Pioglitazone              | Placebo                | WHO definition                                         | 2605  | 2633  | 2.9 |
| ARISE, 2008            | 2003 | Succinobucol              | Placebo                | Joint ESC/ACC definition                               | 3078  | 3066  | 2   |
| AIM-HIGH, 2011         | 2005 | Niacin                    | Placebo                | WHO definition                                         | 1718  | 1696  | 3   |
| IMPROVE-IT, 2015       | 2005 | Ezetimibe and simvastatin | Simvastatin            | ACC definition clinical outcomes for patients with ACS | 9067  | 9077  | 6   |
| HPS2-THRIVE, 2014      | 2007 | Niacin and laropiprant    | Placebo                | UDMI, 2007                                             | 12838 | 12835 | 3.9 |
| dal-OUTCOMES, 2012     | 2008 | Dalcetrapib               | Placebo                | UDMI, 2007                                             | 7938  | 7933  | 2.6 |
| STABILITY, 2014        | 2008 | Darapladib                | Placebo                | UDMI, 2007                                             | 7924  | 7904  | 3.7 |
| TECOS, 2015            | 2008 | Sitagliptin               | Placebo                | ACC definition clinical outcomes for patients with ACS | 7257  | 7266  | 3   |
| SAVE, 2016             | 2008 | CPAP                      | Usual care             | ACC definition clinical                                | 1346  | 1341  | 3.7 |

|                              |      |                                                                                        |                                                                                                           | outcomes<br>for patients<br>with ACS                                             |       |       |     |
|------------------------------|------|----------------------------------------------------------------------------------------|-----------------------------------------------------------------------------------------------------------|----------------------------------------------------------------------------------|-------|-------|-----|
| SIGNIFY, 2014                | 2009 | Ivabradine                                                                             | Placebo                                                                                                   | UDMI, 2007                                                                       | 9550  | 9552  | 2.3 |
| AleCardio, 2014              | 2010 | Aleglitazar                                                                            | Placebo                                                                                                   | UDMI, 2007                                                                       | 3616  | 3610  | 2   |
| ELIXA, 2015                  | 2010 | Lixisenatide                                                                           | Placebo                                                                                                   | AHA/ESC<br>epidemiolog<br>y and<br>clinical<br>research<br>studies<br>definition | 3034  | 3034  | 2   |
| ODYSSEY<br>OUTCOMES,<br>2018 | 2012 | Alirocumab                                                                             | Placebo                                                                                                   | Third<br>UDMI, 2012                                                              | 9462  | 9462  | 2.8 |
| FOURIER, 2017                | 2013 | Evolocumab                                                                             | Placebo                                                                                                   | Third<br>UDMI, 2012                                                              | 13784 | 13780 | 2.2 |
| GLOBAL<br>LEADERS, 2018      | 2013 | Aspirin and<br>ticagrelor one<br>month,<br>subsequently<br>ticagrelor for 23<br>months | Aspirin and<br>ticagrelor or<br>clopidogrel for<br>12 months,<br>subsequently<br>aspirin for 12<br>months | Third<br>UDMI, 2012                                                              | 7980  | 7988  | 2   |
| CIRT, 2019                   | 2013 | Methotrexate                                                                           | Placebo                                                                                                   | Third<br>UDMI, 2012                                                              | 2391  | 2395  | 2.3 |
| ATPCI, 2020                  | 2014 | Trimetazidine                                                                          | Placebo                                                                                                   | Third<br>UDMI, 2012                                                              | 2998  | 3009  | 4   |
| AFIRE, 2019                  | 2015 | Rivaroxaban                                                                            | Rivaroxaban<br>and aspirin                                                                                | Third<br>UDMI, 2012                                                              | 1107  | 1108  | 2   |
| BETonMACE,<br>2020           | 2015 | Apabetalone                                                                            | Placebo                                                                                                   | Third<br>UDMI, 2012                                                              | 1212  | 1206  | 2.2 |

Abbreviations: CABG, coronary artery bypass grafting; CCTA, coronary computed tomographic angiography; MI, myocardial infarction; OMT, optimal medical therapy; PCI, percutaneous coronary intervention; PCTA, percutaneous transluminal coronary angioplasty; UDMI, universal definition of myocardial infarction; WHO, World Health Organization.



**eTable 2.** Assessment of Risk of Bias

| <b>Trial</b>               | Random sequence generation (selection bias) | Allocation concealment (selection bias) | Blinding of participants and personnel (performance bias) | Blinding of outcome assessment (detection bias) | Incomplete outcome assessment (attrition bias) | Selective Reporting (reporting bias) | Other bias |
|----------------------------|---------------------------------------------|-----------------------------------------|-----------------------------------------------------------|-------------------------------------------------|------------------------------------------------|--------------------------------------|------------|
| REGROUP                    | -                                           | -                                       | ?                                                         | -                                               | -                                              | -                                    |            |
| AFIRE                      | -                                           | -                                       | ?                                                         | -                                               | -                                              | -                                    |            |
| DECLARE-TIMI 58            | -                                           | -                                       | -                                                         | -                                               | -                                              | -                                    |            |
| EXCEL                      | -                                           | -                                       | ?                                                         | -                                               | -                                              | -                                    |            |
| THEMIS                     | -                                           | -                                       | -                                                         | -                                               | -                                              | -                                    |            |
| PolyIran                   | +                                           | +                                       | ?                                                         | ?                                               | -                                              | +                                    |            |
| CARMELINA                  | -                                           | -                                       | -                                                         | -                                               | -                                              | -                                    |            |
| CIRT                       | -                                           | -                                       | -                                                         | -                                               | -                                              | -                                    |            |
| COMPLETE                   | -                                           | -                                       | ?                                                         | -                                               | -                                              | -                                    |            |
| VITAL, Omega-3 fatty acid  | -                                           | -                                       | -                                                         | -                                               | -                                              | -                                    |            |
| VITAL, Vitamin D           | -                                           | -                                       | -                                                         | -                                               | -                                              | -                                    |            |
| PIVOTAL                    | -                                           | -                                       | ?                                                         | -                                               | -                                              | -                                    |            |
| REWIND                     | -                                           | -                                       | -                                                         | -                                               | -                                              | -                                    |            |
| REDUCE-IT                  | -                                           | -                                       | -                                                         | -                                               | -                                              | -                                    |            |
| CARES                      | -                                           | -                                       | -                                                         | -                                               | -                                              | -                                    |            |
| GLOBAL LEADERS             | -                                           | -                                       | ?                                                         | -                                               | -                                              | -                                    |            |
| SCOT-HEART                 | -                                           | -                                       | ?                                                         | ?                                               | -                                              | -                                    |            |
| ODYSSEY OUTCOMES           | -                                           | -                                       | -                                                         | -                                               | -                                              | -                                    |            |
| ASPREE                     | -                                           | -                                       | -                                                         | -                                               | -                                              | -                                    |            |
| ARRIVE                     | -                                           | -                                       | -                                                         | -                                               | -                                              | -                                    |            |
| ASCEND, Aspirin            | -                                           | -                                       | -                                                         | -                                               | -                                              | -                                    |            |
| ASCEND, Omega-3 Fatty Acid | -                                           | -                                       | -                                                         | -                                               | -                                              | -                                    |            |
| ROOBY-FS                   | -                                           | -                                       | ?                                                         | -                                               | -                                              | -                                    |            |
| FOURIER                    | -                                           | -                                       | -                                                         | -                                               | -                                              | -                                    |            |
| EXSCEL                     | -                                           | -                                       | -                                                         | -                                               | -                                              | -                                    |            |
| HOPE-3                     | -                                           | -                                       | -                                                         | -                                               | -                                              | -                                    |            |
| SPRINT, 2016 EXAMINATION   | -                                           | -                                       | ?                                                         | -                                               | -                                              | -                                    |            |
| Nissen et al, 2016         | -                                           | -                                       | -                                                         | -                                               | -                                              | -                                    |            |
| SAVE, 2016                 | -                                           | -                                       | ?                                                         | -                                               | -                                              | -                                    |            |
| LEADER                     | -                                           | -                                       | -                                                         | -                                               | -                                              | -                                    |            |
| SUSTAIN-6                  | -                                           | -                                       | -                                                         | -                                               | -                                              | -                                    |            |
| CORONARY IRIS              | -                                           | -                                       | +                                                         | -                                               | -                                              | -                                    |            |
|                            | -                                           | -                                       | -                                                         | -                                               | -                                              | -                                    |            |

|                           |   |   |   |   |   |   |  |
|---------------------------|---|---|---|---|---|---|--|
| DANAMI 3-DEFER            | - | - | ? | - | - | - |  |
| NORSTENT                  | - | - | ? | - | - | - |  |
| EMPA-REG OUTCOME          | - | - | - | - | - | - |  |
| SPRINT, 2015              | - | - | ? | - | - | - |  |
| ELIXA                     | - | - | - | - | - | - |  |
| CSPPT                     | - | - | - | - | - | - |  |
| VADT                      | - | - | ? | - | ? | - |  |
| TECOS                     | - | - | - | - | - | - |  |
| PROMISE                   | - | - | ? | - | - | - |  |
| IMPROVE-IT                | - | - | - | - | - | - |  |
| STABILITY                 | - | - | - | - | - | - |  |
| SORT OUT III              | - | - | ? | - | - | - |  |
| AleCardio                 | ? | ? | - | - | - | - |  |
| JPPP                      | - | - | ? | - | - | - |  |
| HPS2-THRIVE               | - | - | - | - | - | - |  |
| SIGNIFY                   | - | - | - | - | - | - |  |
| SAVOR-TIMI 53             | - | - | - | - | - | - |  |
| Look AHEAD                | - | - | ? | - | - | - |  |
| PHS II                    | - | ? | - | - | - | - |  |
| dal-OUTCOMES              | - | - | - | - | - | - |  |
| FREEDOM                   | - | - | ? | ? | - | - |  |
| ROADMAP                   | - | - | - | - | - | - |  |
| PERFORM                   | - | - | - | - | - | - |  |
| AIM-HIGH                  | - | - | - | - | - | - |  |
| ACCORD, 2011              | - | - | ? | - | - | - |  |
| SEARCH, Simvastatin       | - | - | - | - | ? | - |  |
| SEARCH, Vitamin B9/B12    | - | - | - | - | ? | - |  |
| NAVIGATOR, valsartan      | - | - | - | - | - | - |  |
| Navigator, nateglinide    | - | - | - | - | - | - |  |
| ACCORD, fenofibrate, 2010 | - | - | - | - | - | - |  |
| ACCORD, BP, 2010          | - | - | ? | - | - | - |  |
| DIAD                      | - | - | ? | - | - | - |  |
| RECORD                    | - | - | ? | - | - | - |  |
| BARI 2D                   | - | - | ? | - | - | - |  |
| TRANSCEND                 | - | - | - | - | - | - |  |
| ARISE                     | - | - | - | - | - | - |  |
| PRoFESS                   | - | - | - | - | - | - |  |
| WAFACS                    | ? | ? | - | - | - | - |  |
| ADVANCE, 2008             | - | - | ? | - | - | - |  |
| FeAST                     | - | - | ? | - | - | - |  |
| WAVE                      | - | - | ? | - | - | - |  |

|                                        |   |   |   |   |   |   |  |
|----------------------------------------|---|---|---|---|---|---|--|
| ADVANCE, 2007                          | - | - | ? | - | - | - |  |
| COURAGE                                | - | - | ? | - | - | - |  |
| OAT                                    | - | - | ? | - | - | - |  |
| ESPRIT, 2006                           | - | - | ? | - | - | - |  |
| CHARISMA                               | - | - | - | - | - | - |  |
| RUTH                                   | - | - | - | - | - | - |  |
| 4D                                     | - | - | - | - | - | - |  |
| WHS, aspirin                           | - | - | - | - | - | - |  |
| IDEAL                                  | - | - | ? | - | - | - |  |
| WHS, vitamin E                         | - | - | - | - | - | - |  |
| TNT                                    | - | - | - | - | - | - |  |
| FIELD                                  | - | - | - | - | - | - |  |
| RITA 3                                 | - | - | ? | - | - | - |  |
| PROactive                              | - | - | - | - | - | - |  |
| PROVE IT-TIMI<br>22, 2005              | - | - | - | - | - | - |  |
| HPS, simvastatin                       | - | - | - | - | - | - |  |
| CARDS                                  | - | - | - | - | - | - |  |
| PROVE IT-TIMI<br>22, 2004              | - | - | - | - | - | - |  |
| PEACE                                  | - | - | - | - | - | - |  |
| ALERT                                  | - | - | - | - | - | - |  |
| EUROPA                                 | ? | ? | - | - | - | - |  |
| Indo-Mediterranean<br>Diet Heart Study | ? | ? | ? | ? | - | - |  |
| PROSPER                                | - | - | - | - | - | - |  |
| LIPS                                   | - | - | - | - | - | - |  |
| LIFE                                   | - | - | - | - | - | - |  |
| HPS, vitamins,<br>2002                 | - | - | ? | - | - | - |  |
| HPS, simvastatin,<br>2002              | - | - | ? | - | - | - |  |
| LIPID, 2002                            | - | - | ? | - | - | - |  |
| HERS II                                | - | - | ? | ? | - | - |  |
| ESPRIT, 2002                           | - | - | ? | - | - | - |  |
| ALLHAT-LLT                             | - | - | ? | ? | - | - |  |
| LIPID, 2000                            | - | - | - | - | - | - |  |
| NORDIL                                 | - | - | ? | - | - | - |  |
| ALLHAT                                 | - | - | ? | ? | - | - |  |
| Rubins et al, 1999                     | - | - | - | - | - | - |  |
| CAPPP                                  | - | - | ? | - | - | - |  |
| LIPID, 1998                            | - | - | - | - | - | - |  |
| RITA-1                                 | - | - | ? | - | - | - |  |
| AFCAPS/TeCAPS                          | - | - | - | - | - | - |  |
| UKPDS 33                               | - | - | - | - | - | - |  |
| RITA-2                                 | - | - | ? | - | - | - |  |
| CARE                                   | - | - | - | - | - | - |  |
| TRACE                                  | - | - | - | - | - | - |  |
| ASPECT                                 | ? | ? | - | ? | - | - |  |

|                       |   |   |   |   |   |   |   |
|-----------------------|---|---|---|---|---|---|---|
| 4S                    | - | - | - | - | - | - | - |
| SOLVD                 | - | - | - | - | - | - | - |
| SAVE, 1992            | - | - | - | - | - | - | - |
| SAPAT                 | ? | ? | - | - | - | - | - |
| ETDRS                 | ? | ? | ? | ? | - | - | - |
| STOP-Hypertension     | ? | ? | - | - | - | - | - |
| SALT                  | - | - | ? | - | - | - | - |
| SHEP                  | - | - | - | - | - | - | - |
| Smith et al, 1990     | - | - | - | - | - | - | - |
| PHS                   | - | - | - | - | - | - | - |
| MDPIT                 | - | - | - | - | - | - | - |
| LRC-CPPT              | - | - | - | - | - | - | - |
| Rose et al, 1983      | ? | ? | ? | ? | - | - | - |
| Kornitzer et al, 1983 | ? | ? | ? | ? | - | - | - |
| BHAT                  | - | - | - | - | - | - | - |
| Taylor et al, 1982    | - | - | - | - | - | - | - |
| EPSIM                 | - | - | ? | - | - | - | - |
| Hjermann et al, 1981  | - | - | ? | - | - | - | - |
| AMIS                  | - | - | - | - | - | - | - |
| Coronary Drug Project | - | - | - | - | - | - | - |
| ISCHEMIA              | - | - | ? | - | - | - | - |
| BETonMACE             | - | - | - | - | - | - | - |
| VOYAGER PAD           | - | - | - | - | - | - | - |
| ATPCI                 | - | - | - | - | - | - | - |
| LoDoCo2               | - | - | - | - | - | - | - |

Each domain was judged as ‘low risk of bias’ (-), ‘high risk of bias’ (+), or ‘unclear risk of bias’ (?) in each study according to the Revised Cochrane risk-of-bias tool for randomized trials (Sterne, Jonathan A C et al. “RoB 2: a revised tool for assessing risk of bias in randomised trials.” *BMJ (Clinical research ed.)* vol. 366 14898. 28 Aug. 2019, doi:10.1136/bmj.14898)

**eTable 3. Trial Abbreviations, Names, and Date of Publication**

| Trial abbreviation | Trial name                                                                                                                | Publication date |
|--------------------|---------------------------------------------------------------------------------------------------------------------------|------------------|
| -                  | The Coronary Drug Project <sup>15</sup>                                                                                   | May 1972         |
| AMIS               | Aspirin Myocardial Infarction Study <sup>16</sup>                                                                         | Feb 1980         |
| -                  | Effect of Diet and Smoking Intervention on the Incidence of Coronary Heart Disease – Oslo Study Group <sup>17</sup>       | Dec 1981         |
| EPSIM              | Controlled Comparison of Aspirin and Oral Anticoagulants in Prevention of Death after Myocardial Infarction <sup>18</sup> | Sep 1982         |
| -                  | Long-Term Prevention Study with Oxprenolol in Coronary Heart Disease <sup>19</sup>                                        | Nov 1982         |
| -                  | Belgian Heart Disease Prevention Project: Incidence and Mortality Results <sup>20</sup>                                   | May 1983         |
| -                  | UK Heart Disease Prevention Project: Incidence and Mortality Results <sup>21</sup>                                        | May 1983         |
| BHAT               | A Randomized Trial of Propranolol in Patient with Acute Myocardial Infarction <sup>22</sup>                               | Nov 1983         |
| LRC-CPPT           | The Lipid Research Clinics Coronary Primary Prevention Trial Results <sup>23</sup>                                        | Jan 1984         |
| MDPIT              | The Effect of Diltiazem on Mortality and Reinfarction after Myocardial Infarction <sup>24</sup>                           | Aug 1988         |
| PHS                | Final Report on the Aspirin Component of the Ongoing Physicians' Health Study <sup>25</sup>                               | Jul 1989         |
| -                  | The Effect of Warfarin on Mortality and Reinfarction after Myocardial Infarction <sup>26</sup>                            | Jul 1990         |

|                   |                                                                                                                                                                      |          |
|-------------------|----------------------------------------------------------------------------------------------------------------------------------------------------------------------|----------|
| SHEP              | Prevention of Stroke by Antihypertensive Drug Treatment in Older Persons with Isolated Systolic Hypertension <sup>27</sup>                                           | Jun 1991 |
| SALT              | Swedish Aspirin Low-Dose Trial of 75mg Aspirin as Secondary Prophylaxis after Cerebrovascular Ischemic Events <sup>28</sup>                                          | Nov 1991 |
| STOP-Hypertension | Morbidity and Mortality in the Swedish Trial in Old Patients with Hypertension <sup>29</sup>                                                                         | Nov 1991 |
| SAVE              | Effect of Captopril on Mortality and Morbidity in Patients with Left Ventricular Dysfunction after Myocardial Infarction <sup>30</sup>                               | Sep 1992 |
| ETDRS             | Aspirin Effects on Mortality and Morbidity in Patients with Diabetes Mellitus <sup>31</sup>                                                                          | Sep 1992 |
| SOLVD             | Effect of Enalapril on Myocardial Infarction and Unstable Angina in Patient with Low Ejection Fraction <sup>32</sup>                                                 | Nov 1992 |
| SAPAT             | Double-blind Trial of Aspirin in Primary Prevention of Myocardial Infarction in Patients with Stable Chronic Angina Pectoris <sup>33</sup>                           | Dec 1992 |
| ASPECT            | Effect of Long-term Oral Anticoagulation Treatment on Mortality and Cardiovascular Morbidity after Myocardial Infarction <sup>34</sup>                               | Feb 1994 |
| 4S                | Randomized Trial of Cholesterol Lowering in 4444 Patients with Coronary Heart Disease: the Scandinavian Simvastatin Survival Study <sup>35</sup>                     | Nov 1994 |
| TRACE             | A Clinical Trial of the Angiotensin-converting-enzyme Inhibitor Trandolapril in Patients with Left Ventricular Dysfunction after Myocardial Infarction <sup>36</sup> | Dec 1995 |
| CARE              | The Effect of Pravastatin on Coronary Events after Myocardial Infarction in Patients with Average Cholesterol Levels <sup>37</sup>                                   | Oct 1996 |
| RITA-2            | Coronary Angioplasty versus Medical Therapy for Angina: the Second Randomized Intervention Treatment of Angina <sup>38</sup>                                         | Aug 1997 |

|                |                                                                                                                                                                              |          |
|----------------|------------------------------------------------------------------------------------------------------------------------------------------------------------------------------|----------|
| AFCAPS/TexCAPS | Primary Prevention of Acute Coronary Events with Lovastatin in Men and Women with Average Cholesterol Levels <sup>39</sup>                                                   | May 1998 |
| UKPDS 33       | Intensive Blood-glucose Control with Sulphonylureas or Insulin Compared with Conventional Treatment and Risk of Complications in Patients with Type 2 Diabetes <sup>40</sup> | Sep 1998 |
| RITA-1         | Long-term Results of RITA-1 Trial: Clinical and Cost Comparisons of Coronary Angioplasty and Coronary-artery Bypass Grafting <sup>41</sup>                                   | Oct 1998 |
| LIPID          | Prevention of Cardiovascular Events and Death with Pravastatin in Patients with Coronary Heart Disease and a Broad Range of Initial Cholesterol Levels <sup>42</sup>         | Nov 1998 |
| CAPP           | Effect of Angiotensin-converting-enzyme Inhibition Compared with Conventional Therapy on Cardiovascular Morbidity and Mortality in Hypertension <sup>43</sup>                | Feb 1999 |
| -              | Gemfibrozil for the Secondary Prevention of Coronary Heart Disease in Men with Low Levels of High-density Lipoprotein Cholesterol <sup>44</sup>                              | Aug 1999 |
| ALLHAT         | Major Cardiovascular Events in Hypertensive Patients Randomized to Doxazosin vs Chlorthalidone <sup>45</sup>                                                                 | Apr 2000 |
| NORDIL         | Randomized Trial of Effects of Calcium Antagonists Compared with Diuretics and Beta-blockers on Cardiovascular Morbidity and Mortality in Hypertension <sup>46</sup>         | Jul 2000 |
| LIPID          | Effects of Pravastatin in 3260 Patients with Unstable Angina <sup>47</sup>                                                                                                   | Dec 2000 |
| LIPID          | Long-term Effectiveness and Safety of Pravastatin in 9014 Patients with Coronary Heart Disease and Average Cholesterol Concentrations <sup>48</sup>                          | Apr 2002 |
| LIPS           | Fluvastatin for Prevention of Cardiac Events following Successful First Percutaneous Coronary Intervention <sup>49</sup>                                                     | Jun 2002 |
| HERS II        | Cardiovascular Disease Outcomes during 6.8 Years of Hormone Therapy <sup>50</sup>                                                                                            | Jul 2002 |

|                                     |                                                                                                                                                              |          |
|-------------------------------------|--------------------------------------------------------------------------------------------------------------------------------------------------------------|----------|
| HPS                                 | MRC/BHF Heart Protection Study of Cholesterol Lowering with Simvastatin in 20,536 High-risk Individuals: a Randomized Placebo-controlled Trial <sup>51</sup> | Jul 2002 |
| HPS                                 | MRC/BHF Heart Protection Study of Antioxidant Vitamin Supplementation in 20,536 High-risk Individuals: a Randomized Placebo-controlled Trial <sup>52</sup>   | Jul 2002 |
| LIFE                                | Effects of Losartan on Cardiovascular Morbidity and Mortality in Patients with Isolated Systolic Hypertension and Left Ventricular Hypertrophy <sup>53</sup> | Sep 2002 |
| Indo-Mediterranean Diet Heart Study | Effect of an Indo-Mediterranean Diet on Progression of Coronary Artery Disease in High Risk Patients <sup>54</sup>                                           | Nov 2002 |
| PROSPER                             | Pravastatin in Elderly Individuals at Risk of Vascular Disease <sup>55</sup>                                                                                 | Nov 2002 |
| ALLHAT-LLT                          | Major Outcomes in Moderately Hypercholesterolemic, Hypertensive Patients Randomized to Pravastatin vs. Usual Care <sup>56</sup>                              | Dec 2002 |
| ESPRIT                              | Oestrogen Therapy for Prevention of Reinfarction in Postmenopausal Women <sup>57</sup>                                                                       | Dec 2002 |
| ALERT                               | Effect of Fluvastatin on Cardiac Outcomes in Renal Transplant Recipients <sup>58</sup>                                                                       | Jun 2003 |
| EUROPA                              | Efficacy of Perindopril in Reduction of Cardiovascular Events among Patients with Stable Coronary Artery Disease <sup>59</sup>                               | Sep 2003 |
| PROVE IT-TIMI 22                    | Intensive Versus Moderate Lipid Lowering with Statins after Acute Coronary Syndromes <sup>60</sup>                                                           | Apr 2004 |
| CARDS                               | Primary Prevention of Cardiovascular Disease with Atorvastatin in Type 2 Diabetes in the Collaborative Atorvastatin Diabetes Study <sup>61</sup>             | Aug 2004 |
| PEACE                               | Angiotensin-converting-enzyme Inhibition in Stable Coronary Artery Disease <sup>62</sup>                                                                     | Nov 2004 |
| WHS                                 | A Randomized Trial of Low-dose Aspirin in the Primary Prevention of Cardiovascular Disease in Women <sup>63</sup>                                            | Mar 2005 |



|                  |                                                                                                                              |          |
|------------------|------------------------------------------------------------------------------------------------------------------------------|----------|
| TNT              | Intensive Lipid Lowering with Atorvastatin in Patients with Stable Coronary Disease <sup>64</sup>                            | Apr 2005 |
| PROVE IT-TIMI 22 | Antibiotic Treatment of Chlamydia pneumoniae after Acute Coronary Syndrome <sup>65</sup>                                     | Apr 2005 |
| WHS              | Vitamin E in the Primary Prevention of Cardiovascular Disease and Cancer: the Women's Health Study <sup>66</sup>             | Jul 2005 |
| 4D               | Atorvastatin in Patients with Type 2 Diabetes Mellitus Undergoing Hemodialysis <sup>67</sup>                                 | Jul 2005 |
| RITA-3           | 5-year Outcome of an Interventional Strategy in Non-ST-Elevation Acute Coronary Syndrome <sup>68</sup>                       | Sep 2005 |
| PROactive        | Secondary Prevention of Macrovascular Events in Patients with Type 2 Diabetes in the PROactive Study <sup>69</sup>           | Oct 2005 |
| IDEAL            | High-dose Atorvastatin vs Usual-dose Simvastatin for Secondary Prevention after Myocardial Infarction <sup>70</sup>          | Nov 2005 |
| FIELD            | Effects of Long-term Fenofibrate Therapy on Cardiovascular Events in 9795 people with Type 2 Diabetes Mellitus <sup>71</sup> | Nov 2005 |
| CHARISMA         | Clopidogrel and Aspirin Versus Aspirin Alone for the Prevention of Atherothrombotic Events <sup>72</sup>                     | Apr 2006 |
| ESPRIT           | Aspirin Plus Dipyridamole Versus Aspirin Alone after Cerebral Ischemia of Arterial Origin <sup>73</sup>                      | May 2006 |
| RUTH             | Effects of Raloxifene on Cardiovascular Events and Breast Cancer in Postmenopausal Women <sup>74</sup>                       | Jul 2006 |
| OAT              | Coronary Intervention for Persistent Occlusion after Myocardial Infarction <sup>3</sup>                                      | Dec 2006 |
| FeAST            | Reduction of Iron Stores and Cardiovascular Outcomes in Patients with Peripheral Arterial Disease <sup>75</sup>              | Feb 2007 |
| COURAGE          | Optimal Medical Therapy With or Without PCI for Stable Coronary Disease <sup>2</sup>                                         | Apr 2007 |
| WAVE             | Oral Anticoagulation and Antiplatelet Therapy and Peripheral Artery Disease <sup>76</sup>                                    | Jul 2007 |

|           |                                                                                                                                                                            |          |
|-----------|----------------------------------------------------------------------------------------------------------------------------------------------------------------------------|----------|
| ADVANCE   | Effects of a Fixed Combination of Perindopril and Indapamide on Macrovascular and Microvascular Outcomes in Patients with Type 2 Diabetes Mellitus <sup>77</sup>           | Sep 2007 |
| WAFACS    | Effect of Folic Acid and B Vitamins on Risk of Cardiovascular Events and Total Mortality Among Women at High Risk for Cardiovascular Disease <sup>78</sup>                 | May 2008 |
| ARISE     | Effects of Succinobucol (AGI-1067) after an Acute Coronary Syndrome <sup>79</sup>                                                                                          | May 2008 |
| ADVANCE   | Intensive Blood Glucose Control and Vascular Outcomes in Patients with Type 2 Diabetes <sup>80</sup>                                                                       | Jun 2008 |
| PRoFESS   | Aspirin and Extended-release Dipyridamole versus Clopidogrel for Recurrent Stroke <sup>81</sup>                                                                            | Sep 2008 |
| TRANSCEND | Effect of the Angiotensin-receptor Blocker Telmisartan on Cardiovascular Events in High-risk Patients Intolerant to Angiotensin-converting Enzyme Inhibitors <sup>82</sup> | Sep 2008 |
| DIAD      | Cardiac Outcomes after Screening for Asymptomatic Coronary Artery Disease in Patients with Type 2 Diabetes <sup>83</sup>                                                   | Apr 2009 |
| BARI 2D   | A Randomized Trial of Therapies for Type 2 Diabetes and Coronary Artery Disease <sup>4</sup>                                                                               | Jun 2009 |
| RECORD    | Rosiglitazone Evaluated for Cardiovascular Outcomes in Oral Agent Combination Therapy for Type 2 Diabetes <sup>84</sup>                                                    | Jun 2009 |
| NAVIGATOR | Effect of Nateglinide on the Incidence of Diabetes and Cardiovascular Events <sup>85</sup>                                                                                 | Apr 2010 |
| NAVIGATOR | Effect of Valsartan on the Incidence of Diabetes and Cardiovascular Events <sup>86</sup>                                                                                   | Apr 2010 |
| ACCORD    | Effects of Intensive Blood-pressure Control in Type 2 Diabetes <sup>14</sup>                                                                                               | Apr 2010 |
| ACCORD    | Effects of Combination Lipid Therapy in Type 2 Diabetes Mellitus <sup>87</sup>                                                                                             | Apr 2010 |
| SEARCH    | Effects of Homocysteine-lowering with Folic Acid plus Vitamin B12 vs Placebo on Mortality and Major Morbidity in Myocardial Infarction Survivors <sup>88</sup>             | Jun 2010 |

|               |                                                                                                                                                                   |          |
|---------------|-------------------------------------------------------------------------------------------------------------------------------------------------------------------|----------|
| SEARCH        | Intensive Lowering of LDL Cholesterol with 80mg Versus 20mg Simvastatin Daily in 12,064 Survivors of Myocardial Infarction <sup>89</sup>                          | Jun 2010 |
| ACCORD        | Long-term Effects of Intensive Glucose Lowering on Cardiovascular Outcomes <sup>90</sup>                                                                          | Mar 2011 |
| ROADMAP       | Olmesartan for the Delay or Prevention of Microalbuminuria in Type 2 Diabetes <sup>91</sup>                                                                       | Mar 2011 |
| PERFORM       | Terutroban versus Aspirin in Patients with Cerebral Ischaemic Events <sup>92</sup>                                                                                | Jun 2011 |
| AIM-HIGH      | Niacin in Patients with Low HDL Cholesterol Levels Receiving Intensive Statin Therapy <sup>93</sup>                                                               | Dec 2011 |
| PHS II        | Multivitamins in the Prevention of Cardiovascular Disease in Men <sup>94</sup>                                                                                    | Nov 2012 |
| dal-OUTCOMES  | Effects of Dalcetrapib in Patients with a Recent Acute Coronary Syndrome <sup>95</sup>                                                                            | Nov 2012 |
| FREEDOM       | Strategies for Multivessel Revascularization in Patients with Diabetes <sup>6</sup>                                                                               | Dec 2012 |
| Look AHEAD    | Cardiovascular Effects of Intensive Lifestyle Intervention in Type 2 Diabetes <sup>96</sup>                                                                       | Jul 2013 |
| SAVOR-TIMI 53 | Saxagliptin and Cardiovascular Outcomes in Patients with Type 2 Diabetes Mellitus <sup>97</sup>                                                                   | Oct 2013 |
| AleCardio     | Effect of Alogliptin on Cardiovascular Outcomes After Acute Coronary Syndrome in Patients with Type 2 Diabetes Mellitus <sup>98</sup>                             | Apr 2014 |
| STABILITY     | Darapladib for Preventing Ischemic Events in Stable Coronary Artery Disease <sup>99</sup>                                                                         | May 2014 |
| SORT OUT III  | Differential Clinical Outcomes after 1 Year Versus 5 Years in a Randomized Comparison of Zotarolimus-eluting and Sirolimus-eluting Coronary Stents <sup>100</sup> | Jun 2014 |
| HPS2-THRIVE   | Effects of Extended-release Niacin with Laropiprant in High-risk Patients <sup>101</sup>                                                                          | Jul 2014 |
| SIGNIFY       | Ivabradine in Stable Coronary Artery Disease Without Clinical Heart Failure <sup>102</sup>                                                                        | Sep 2014 |

|                  |                                                                                                                                                              |          |
|------------------|--------------------------------------------------------------------------------------------------------------------------------------------------------------|----------|
| JPPP             | Low-dose Aspirin for Primary Prevention of Cardiovascular Events in Japanese Patients 60 Years or Older with Atherosclerotic Risk Factors <sup>103</sup>     | Dec 2014 |
| PROMISE          | Outcomes of Anatomical Versus Functional Testing for Coronary Artery Disease <sup>104</sup>                                                                  | Apr 2015 |
| CSPPT            | Efficacy of Folic Acid Therapy in Primary Prevention of Stroke Among Adults with Hypertension in China <sup>105</sup>                                        | Apr 2015 |
| VADT             | Follow-up of Glycemic Control and Cardiovascular Outcomes in Type 2 Diabetes <sup>106</sup>                                                                  | Jun 2015 |
| IMPROVE-IT       | Ezetimibe Added to Statin Therapy after Acute Coronary Syndromes <sup>107</sup>                                                                              | Jun 2015 |
| TECOS            | Effect of Sitagliptin on Cardiovascular Outcomes in Type 2 Diabetes <sup>108</sup>                                                                           | Jul 2015 |
| EMPA-REG OUTCOME | Empagliflozin, Cardiovascular Outcomes, and Mortality in Type 2 Diabetes <sup>109</sup>                                                                      | Nov 2015 |
| SPRINT           | A Randomized Trial of Intensive Versus Standard Blood-pressure Control <sup>110</sup>                                                                        | Nov 2015 |
| ELIXA            | Lixisenatide in Patients with Type 2 Diabetes and Acute Coronary Syndrome <sup>111</sup>                                                                     | Dec 2015 |
| EXAMINATION      | Clinical Outcomes in Patients with ST-segment Elevation Myocardial Infarction Treated with Everolimus-eluting Stents Versus Bare-metal Stents <sup>112</sup> | Jan 2016 |
| -                | Effect of Naltrexone-bupropion on Major Adverse Cardiovascular Events in Overweight and Obese Patients with Cardiovascular Risk Factors <sup>113</sup>       | Mar 2016 |
| IRIS             | Pioglitazone after Ischemic Stroke or Transient Ischemic Attack <sup>114</sup>                                                                               | Apr 2016 |
| HOPE-3           | Cholesterol Lowering in Intermediate-Risk Persons without Cardiovascular Disease <sup>115</sup>                                                              | May 2016 |
| DANAMI 3-DEFER   | Deferred Versus Conventional Stent Implantation in Patients with ST-segment Elevation Myocardial Infarction <sup>116</sup>                                   | May 2016 |

|                |                                                                                                                                                                                                                                                        |           |
|----------------|--------------------------------------------------------------------------------------------------------------------------------------------------------------------------------------------------------------------------------------------------------|-----------|
| SPRINT         | Intensive vs Standard Blood Pressure Control and Cardiovascular Disease Outcomes in Adults Aged $\geq 75$ Years <sup>117</sup>                                                                                                                         | Jun 2016  |
| LEADER         | Liraglutide and Cardiovascular Outcomes in Type 2 Diabetes <sup>118</sup>                                                                                                                                                                              | Jul 2016  |
| SAVE           | CPAP for Prevention of Cardiovascular Events in Obstructive Sleep Apnea <sup>119</sup>                                                                                                                                                                 | Sep 2016  |
| NORSTENT       | Drug-eluting or Bare-metal Stents for Coronary Artery Disease <sup>120</sup>                                                                                                                                                                           | Sep 2016  |
| SUSTAIN-6      | Semaglutide and Cardiovascular Outcomes in Patients with Type 2 Diabetes <sup>121</sup>                                                                                                                                                                | Nov 2016  |
| CORONARY       | Five-year Outcomes after Off-pump or On-pump Coronary-artery Bypass Grafting <sup>122</sup>                                                                                                                                                            | Dec 2016  |
| FOURIER        | Evolocumab and Clinical Outcomes in Patients with Cardiovascular Disease <sup>123</sup>                                                                                                                                                                | May 2017  |
| ROOBY-FS       | Five-year Outcomes after On-pump and Off-pump Coronary-artery bypass <sup>124</sup>                                                                                                                                                                    | Aug 2017  |
| EXSCEL         | Effects of Once-weekly Exenatide on Cardiovascular Outcomes in Type 2 Diabetes <sup>125</sup>                                                                                                                                                          | Sept 2017 |
| CARES          | Cardiovascular Safety of Febuxostat or Allopurinol in Patients with Gout <sup>126</sup>                                                                                                                                                                | Mar 2018  |
| SCOT-HEART     | Coronary CT Angiography and 5-year Risk of Myocardial Infarction <sup>127</sup>                                                                                                                                                                        | Sep 2018  |
| GLOBAL LEADERS | Ticagrelor Plus Aspirin for 1 Month, Followed by Ticagrelor Monotherapy for 23 Months vs Aspirin Plus Clopidogrel or Ticagrelor for 12 Months, Followed by Aspirin Monotherapy for 12 Months After Implantation of a Drug-eluting Stent <sup>128</sup> | Sep 2018  |
| ARRIVE         | Use of Aspirin to Reduce Risk of Initial Vascular Events in Patients at Moderate Risk of Cardiovascular Disease <sup>129</sup>                                                                                                                         | Sep 2018  |
| ASCEND         | Effects of Aspirin for Primary Prevention in Persons with Diabetes Mellitus <sup>130</sup>                                                                                                                                                             | Oct 2018  |
| ASCEND         | Effects of n-3 Fatty Acid Supplements in Diabetes Mellitus <sup>131</sup>                                                                                                                                                                              | Oct 2018  |

|                  |                                                                                                                                                      |           |
|------------------|------------------------------------------------------------------------------------------------------------------------------------------------------|-----------|
| ASPREE           | Effect of Aspirin on Cardiovascular Events and Bleeding in the Healthy Elderly <sup>132</sup>                                                        | Oct 2018  |
| ODYSSEY OUTCOMES | Alirocumab and Cardiovascular Outcomes after Acute Coronary Syndrome <sup>133</sup>                                                                  | Nov 2018  |
| CARMELINA        | Effect of Linagliptin vs Placebo on Major Cardiovascular Events in Adults with Type 2 Diabetes and High Cardiovascular and Renal Risk <sup>134</sup> | Jan 2019  |
| REDUCE-IT        | Cardiovascular Risk Reduction with Icosapent Ethyl for Hypertriglyceridemia <sup>135</sup>                                                           | Jan 2019  |
| VITAL            | Marine n-3 Fatty Acids and Prevention of Cardiovascular Disease and Cancer <sup>136</sup>                                                            | Jan 2019  |
| VITAL            | Vitamin D Supplements and Prevention of Cancer and Cardiovascular Disease <sup>137</sup>                                                             | Jan 2019  |
| REGROUP          | Randomized Trial of Endoscopic or Open Vein-graft Harvesting for Coronary-artery Bypass <sup>138</sup>                                               | Jan 2019  |
| DECLARE-TIMI 58  | Dapagliflozin and Cardiovascular Outcomes in Type 2 Diabetes <sup>139</sup>                                                                          | Jan 2019  |
| PIVOTAL          | Intravenous Iron in Patients Undergoing Maintenance Hemodialysis <sup>140</sup>                                                                      | Jan 2019  |
| CIRT             | Low-dose Methotrexate for the Prevention of Atherosclerotic Events <sup>141</sup>                                                                    | Feb 2019  |
| REWIND           | Dulaglutide and Cardiovascular Outcomes in Type 2 Diabetes <sup>142</sup>                                                                            | July 2019 |
| PolyIran         | Effectiveness of Polypill for Primary and Secondary Prevention of Cardiovascular Diseases <sup>143</sup>                                             | Aug 2019  |
| AFIRE            | Antithrombotic Therapy for Atrial Fibrillation with Stable Coronary Disease <sup>144</sup>                                                           | Sep 2019  |
| THEMIS           | Ticagrelor in Patients with Stable Coronary Disease and Diabetes <sup>145</sup>                                                                      | Oct 2019  |
| COMPLETE         | Complete Revascularization with Multivessel PCI for Myocardial Infarction <sup>146</sup>                                                             | Oct 2019  |
| EXCEL            | Five-year Outcomes after PCI or CABG for Left Main Coronary Disease <sup>10</sup>                                                                    | Nov 2019  |

|             |                                                                                                                                                                           |           |
|-------------|---------------------------------------------------------------------------------------------------------------------------------------------------------------------------|-----------|
| -           | A Comparison of Two LDL Cholesterol Targets after Ischemic Stroke <sup>147</sup>                                                                                          | Jan 2020  |
| ISCHEMIA    | Initial Invasive or Conservative Strategy for Stable Coronary Disease <sup>11</sup>                                                                                       | Apr 2020  |
| BETonMACE   | Effect of Apabetalone Added to Standard Therapy on Major Adverse Cardiovascular Events in Patients with Recent Acute Coronary Syndrome and Type 2 Diabetes <sup>148</sup> | Apr 2020  |
| VOYAGER PAD | Rivaroxaban in Peripheral Artery Disease after Revascularization <sup>149</sup>                                                                                           | May 2020  |
| ATPCI       | Efficacy and Safety of Trimetazidine after Percutaneous Coronary Intervention <sup>150</sup>                                                                              | Sept 2020 |
| LoDoCo2     | Colchicine in Patients with Chronic Coronary Disease <sup>151</sup>                                                                                                       | Nov 2020  |

## eReferences

1. Nomenclature and criteria for diagnosis of ischemic heart disease. Report of the Joint International Society and Federation of Cardiology/World Health Organization task force on standardization of clinical nomenclature. *Circulation*. 1979;59(3):607-609.
2. Boden WE, O'Rourke RA, Teo KK, et al. Optimal medical therapy with or without PCI for stable coronary disease. *N Engl J Med*. 2007;356(15):1503-1516.
3. Hochman JS, Lamas GA, Buller CE, et al. Coronary intervention for persistent occlusion after myocardial infarction. *N Engl J Med*. 2006;355(23):2395-2407.
4. Group BDS, Frye RL, August P, et al. A randomized trial of therapies for type 2 diabetes and coronary artery disease. *N Engl J Med*. 2009;360(24):2503-2515.
5. Thygesen K, Alpert JS, White HD, et al. Universal definition of myocardial infarction. *Circulation*. 2007;116(22):2634-2653.
6. Farkouh ME, Domanski M, Sleeper LA, et al. Strategies for multivessel revascularization in patients with diabetes. *N Engl J Med*. 2012;367(25):2375-2384.
7. Cannon CP, Battler A, Brindis RG, et al. American College of Cardiology key data elements and definitions for measuring the clinical management and outcomes of patients with acute coronary syndromes. A report of the American College of Cardiology Task Force on Clinical Data Standards (Acute Coronary Syndromes Writing Committee). *J Am Coll Cardiol*. 2001;38(7):2114-2130.
8. Vranckx P, Cutlip DE, Mehran R, et al. Myocardial infarction adjudication in contemporary all-comer stent trials: balancing sensitivity and specificity. Addendum to the historical MI definitions used in stent studies. *EuroIntervention*. 2010;5(7):871-874.
9. Thygesen K, Alpert JS, Jaffe AS, et al. Third universal definition of myocardial infarction. *J Am Coll Cardiol*. 2012;60(16):1581-1598.
10. Stone GW, Kappetein AP, Sabik JF, et al. Five-Year Outcomes after PCI or CABG for Left Main Coronary Disease. *N Engl J Med*. 2019;381(19):1820-1830.
11. Maron DJ, Hochman JS, Reynolds HR, et al. Initial Invasive or Conservative Strategy for Stable Coronary Disease. *N Engl J Med*. 2020;382(15):1395-1407.
12. Alpert JS, Thygesen K, Antman E, Bassand JP. Myocardial infarction redefined--a consensus document of The Joint European Society of Cardiology/American College of Cardiology Committee for the redefinition of myocardial infarction. *J Am Coll Cardiol*. 2000;36(3):959-969.
13. Luepker RV, Apple FS, Christenson RH, et al. Case definitions for acute coronary heart disease in epidemiology and clinical research studies: a statement from the AHA Council on Epidemiology and Prevention; AHA Statistics Committee; World Heart Federation Council on Epidemiology and Prevention; the European Society of Cardiology Working Group on Epidemiology and Prevention; Centers for Disease Control and Prevention; and the National Heart, Lung, and Blood Institute. *Circulation*. 2003;108(20):2543-2549.
14. Action to Control Cardiovascular Risk in Diabetes Study G, Gerstein HC, Miller ME, et al. Effects of intensive glucose lowering in type 2 diabetes. *N Engl J Med*. 2008;358(24):2545-2559.
15. The Coronary Drug Project: Findings Leading to Further Modifications of Its Protocol With Respect to Dextrothyroxine. *JAMA*. 1972;220(7):996-1008.
16. A Randomized, Controlled Trial of Aspirin in Persons Recovered From Myocardial Infarction. *JAMA*. 1980;243(7):661-669.



17. Hjermann I, Velve Byre K, Holme I, Leren P. Effect of diet and smoking intervention on the incidence of coronary heart disease. Report from the Oslo Study Group of a randomised trial in healthy men. *Lancet*. 1981;2(8259):1303-1310.
18. A Controlled Comparison of Aspirin and Oral Anticoagulants in Prevention of Death after Myocardial Infarction. *New England Journal of Medicine*. 1982;307(12):701-708.
19. Taylor SH, Silke B, Ebbutt A, Sutton GC, Prout BJ, Burley DM. A Long-Term Prevention Study with Oxprenolol in Coronary Heart Disease. *New England Journal of Medicine*. 1982;307(21):1293-1301.
20. Kornitzer M, Dramaix M, Thilly C, et al. BELGIAN HEART DISEASE PREVENTION PROJECT: INCIDENCE AND MORTALITY RESULTS. *The Lancet*. 1983;321(8333):1066-1070.
21. Rose G, Tunstall-Pedoe HD, Heller RF. UK HEART DISEASE PREVENTION PROJECT: INCIDENCE AND MORTALITY RESULTS. *The Lancet*. 1983;321(8333):1062-1066.
22. A randomized trial of propranolol in patients with acute myocardial infarction. II. Morbidity results. *Jama*. 1983;250(20):2814-2819.
23. The Lipid Research Clinics Coronary Primary Prevention Trial Results: I. Reduction in Incidence of Coronary Heart Disease. *JAMA*. 1984;251(3):351-364.
24. The Effect of Diltiazem on Mortality and Reinfarction after Myocardial Infarction. *New England Journal of Medicine*. 1988;319(7):385-392.
25. Final report on the aspirin component of the ongoing Physicians' Health Study. *N Engl J Med*. 1989;321(3):129-135.
26. Smith P, Arnesen H, Holme I. The effect of warfarin on mortality and reinfarction after myocardial infarction. *N Engl J Med*. 1990;323(3):147-152.
27. Prevention of stroke by antihypertensive drug treatment in older persons with isolated systolic hypertension. Final results of the Systolic Hypertension in the Elderly Program (SHEP). SHEP Cooperative Research Group. *Jama*. 1991;265(24):3255-3264.
28. Swedish Aspirin Low-Dose Trial (SALT) of 75 mg aspirin as secondary prophylaxis after cerebrovascular ischaemic events. The SALT Collaborative Group. *Lancet*. 1991;338(8779):1345-1349.
29. Dahlöf B, Lindholm LH, Hansson L, Scherstén B, Ekblom T, Wester PO. Morbidity and mortality in the Swedish Trial in Old Patients with Hypertension (STOP-Hypertension). *Lancet*. 1991;338(8778):1281-1285.
30. Pfeffer MA, Braunwald E, Moyé LA, et al. Effect of captopril on mortality and morbidity in patients with left ventricular dysfunction after myocardial infarction. Results of the survival and ventricular enlargement trial. The SAVE Investigators. *N Engl J Med*. 1992;327(10):669-677.
31. Aspirin effects on mortality and morbidity in patients with diabetes mellitus. Early Treatment Diabetic Retinopathy Study report 14. ETDRS Investigators. *Jama*. 1992;268(10):1292-1300.
32. Yusuf S, Pepine CJ, Garces C, et al. Effect of enalapril on myocardial infarction and unstable angina in patients with low ejection fractions. *Lancet*. 1992;340(8829):1173-1178.
33. Juul-Möller S, Edvardsson N, Jahnmatz B, Rosén A, Sørensen S, Omblus R. Double-blind trial of aspirin in primary prevention of myocardial infarction in patients with stable chronic angina pectoris. The Swedish Angina Pectoris Aspirin Trial (SAPAT) Group. *Lancet*. 1992;340(8833):1421-1425.
34. Effect of long-term oral anticoagulant treatment on mortality and cardiovascular morbidity after myocardial infarction. Anticoagulants in the Secondary Prevention of Events in Coronary Thrombosis (ASPECT) Research Group. *Lancet*. 1994;343(8896):499-503.
35. Randomised trial of cholesterol lowering in 4444 patients with coronary heart disease: the Scandinavian Simvastatin Survival Study (4S). *Lancet*. 1994;344(8934):1383-1389.

36. Køber L, Torp-Pedersen C, Carlsen JE, et al. A clinical trial of the angiotensin-converting-enzyme inhibitor trandolapril in patients with left ventricular dysfunction after myocardial infarction. Trandolapril Cardiac Evaluation (TRACE) Study Group. *N Engl J Med*. 1995;333(25):1670-1676.
37. Sacks FM, Pfeffer MA, Moye LA, et al. The effect of pravastatin on coronary events after myocardial infarction in patients with average cholesterol levels. Cholesterol and Recurrent Events Trial investigators. *N Engl J Med*. 1996;335(14):1001-1009.
38. Coronary angioplasty versus medical therapy for angina: the second Randomised Intervention Treatment of Angina (RITA-2) trial. RITA-2 trial participants. *Lancet*. 1997;350(9076):461-468.
39. Downs JR, Clearfield M, Weis S, et al. Primary prevention of acute coronary events with lovastatin in men and women with average cholesterol levels: results of AFCAPS/TexCAPS. Air Force/Texas Coronary Atherosclerosis Prevention Study. *Jama*. 1998;279(20):1615-1622.
40. Intensive blood-glucose control with sulphonylureas or insulin compared with conventional treatment and risk of complications in patients with type 2 diabetes (UKPDS 33). UK Prospective Diabetes Study (UKPDS) Group. *Lancet*. 1998;352(9131):837-853.
41. Henderson RA, Pocock SJ, Sharp SJ, et al. Long-term results of RITA-1 trial: clinical and cost comparisons of coronary angioplasty and coronary-artery bypass grafting. Randomised Intervention Treatment of Angina. *Lancet*. 1998;352(9138):1419-1425.
42. Prevention of cardiovascular events and death with pravastatin in patients with coronary heart disease and a broad range of initial cholesterol levels. *N Engl J Med*. 1998;339(19):1349-1357.
43. Hansson L, Lindholm LH, Niskanen L, et al. Effect of angiotensin-converting-enzyme inhibition compared with conventional therapy on cardiovascular morbidity and mortality in hypertension: the Captopril Prevention Project (CAPPP) randomised trial. *Lancet*. 1999;353(9153):611-616.
44. Rubins HB, Robins SJ, Collins D, et al. Gemfibrozil for the secondary prevention of coronary heart disease in men with low levels of high-density lipoprotein cholesterol. Veterans Affairs High-Density Lipoprotein Cholesterol Intervention Trial Study Group. *N Engl J Med*. 1999;341(6):410-418.
45. Major cardiovascular events in hypertensive patients randomized to doxazosin vs chlorthalidone: the antihypertensive and lipid-lowering treatment to prevent heart attack trial (ALLHAT). ALLHAT Collaborative Research Group. *Jama*. 2000;283(15):1967-1975.
46. Hansson L, Hedner T, Lund-Johansen P, et al. Randomised trial of effects of calcium antagonists compared with diuretics and beta-blockers on cardiovascular morbidity and mortality in hypertension: the Nordic Diltiazem (NORDIL) study. *Lancet*. 2000;356(9227):359-365.
47. Tonkin AM, Colquhoun D, Emberson J, et al. Effects of pravastatin in 3260 patients with unstable angina: results from the LIPID study. *Lancet*. 2000;356(9245):1871-1875.
48. Long-term effectiveness and safety of pravastatin in 9014 patients with coronary heart disease and average cholesterol concentrations: the LIPID trial follow-up. *Lancet*. 2002;359(9315):1379-1387.
49. Serruys PW, de Feyter P, Macaya C, et al. Fluvastatin for prevention of cardiac events following successful first percutaneous coronary intervention: a randomized controlled trial. *Jama*. 2002;287(24):3215-3222.
50. Grady D, Herrington D, Bittner V, et al. Cardiovascular disease outcomes during 6.8 years of hormone therapy: Heart and Estrogen/progestin Replacement Study follow-up (HERS II). *Jama*. 2002;288(1):49-57.
51. MRC/BHF Heart Protection Study of cholesterol lowering with simvastatin in 20,536 high-risk individuals: a randomised placebo-controlled trial. *Lancet*. 2002;360(9326):7-22.
52. MRC/BHF Heart Protection Study of antioxidant vitamin supplementation in 20,536 high-risk individuals: a randomised placebo-controlled trial. *Lancet*. 2002;360(9326):23-33.

53. Kjeldsen SE, Dahlöf B, Devereux RB, et al. Effects of losartan on cardiovascular morbidity and mortality in patients with isolated systolic hypertension and left ventricular hypertrophy: a Losartan Intervention for Endpoint Reduction (LIFE) substudy. *Jama*. 2002;288(12):1491-1498.
54. Singh RB, Dubnov G, Niaz MA, et al. Effect of an Indo-Mediterranean diet on progression of coronary artery disease in high risk patients (Indo-Mediterranean Diet Heart Study): a randomised single-blind trial. *Lancet*. 2002;360(9344):1455-1461.
55. Shepherd J, Blauw GJ, Murphy MB, et al. Pravastatin in elderly individuals at risk of vascular disease (PROSPER): a randomised controlled trial. *Lancet*. 2002;360(9346):1623-1630.
56. Major outcomes in moderately hypercholesterolemic, hypertensive patients randomized to pravastatin vs usual care: The Antihypertensive and Lipid-Lowering Treatment to Prevent Heart Attack Trial (ALLHAT-LLT). *Jama*. 2002;288(23):2998-3007.
57. Cherry N, Gilmour K, Hannaford P, et al. Oestrogen therapy for prevention of reinfarction in postmenopausal women: a randomised placebo controlled trial. *Lancet*. 2002;360(9350):2001-2008.
58. Holdaas H, Fellström B, Jardine AG, et al. Effect of fluvastatin on cardiac outcomes in renal transplant recipients: a multicentre, randomised, placebo-controlled trial. *Lancet*. 2003;361(9374):2024-2031.
59. Fox KM. Efficacy of perindopril in reduction of cardiovascular events among patients with stable coronary artery disease: randomised, double-blind, placebo-controlled, multicentre trial (the EUROPA study). *Lancet*. 2003;362(9386):782-788.
60. Cannon CP, Braunwald E, McCabe CH, et al. Intensive versus moderate lipid lowering with statins after acute coronary syndromes. *N Engl J Med*. 2004;350(15):1495-1504.
61. Colhoun HM, Betteridge DJ, Durrington PN, et al. Primary prevention of cardiovascular disease with atorvastatin in type 2 diabetes in the Collaborative Atorvastatin Diabetes Study (CARDS): multicentre randomised placebo-controlled trial. *Lancet*. 2004;364(9435):685-696.
62. Angiotensin-Converting-Enzyme Inhibition in Stable Coronary Artery Disease. *New England Journal of Medicine*. 2004;351(20):2058-2068.
63. Ridker PM, Cook NR, Lee IM, et al. A randomized trial of low-dose aspirin in the primary prevention of cardiovascular disease in women. *N Engl J Med*. 2005;352(13):1293-1304.
64. LaRosa JC, Grundy SM, Waters DD, et al. Intensive lipid lowering with atorvastatin in patients with stable coronary disease. *N Engl J Med*. 2005;352(14):1425-1435.
65. Cannon CP, Braunwald E, McCabe CH, et al. Antibiotic treatment of Chlamydia pneumoniae after acute coronary syndrome. *N Engl J Med*. 2005;352(16):1646-1654.
66. Lee IM, Cook NR, Gaziano JM, et al. Vitamin E in the primary prevention of cardiovascular disease and cancer: the Women's Health Study: a randomized controlled trial. *Jama*. 2005;294(1):56-65.
67. Wanner C, Krane V, März W, et al. Atorvastatin in patients with type 2 diabetes mellitus undergoing hemodialysis. *N Engl J Med*. 2005;353(3):238-248.
68. Fox KA, Poole-Wilson P, Clayton TC, et al. 5-year outcome of an interventional strategy in non-ST-elevation acute coronary syndrome: the British Heart Foundation RITA 3 randomised trial. *Lancet*. 2005;366(9489):914-920.
69. Dormandy JA, Charbonnel B, Eckland DJ, et al. Secondary prevention of macrovascular events in patients with type 2 diabetes in the PROactive Study (PROspective pioglitAzone Clinical Trial In macroVascular Events): a randomised controlled trial. *Lancet*. 2005;366(9493):1279-1289.
70. Pedersen TR, Faergeman O, Kastelein JJ, et al. High-dose atorvastatin vs usual-dose simvastatin for secondary prevention after myocardial infarction: the IDEAL study: a randomized controlled trial. *Jama*. 2005;294(19):2437-2445.

71. Keech A, Simes RJ, Barter P, et al. Effects of long-term fenofibrate therapy on cardiovascular events in 9795 people with type 2 diabetes mellitus (the FIELD study): randomised controlled trial. *Lancet*. 2005;366(9500):1849-1861.
72. Bhatt DL, Fox KA, Hacke W, et al. Clopidogrel and aspirin versus aspirin alone for the prevention of atherothrombotic events. *N Engl J Med*. 2006;354(16):1706-1717.
73. Halkes PH, van Gijn J, Kappelle LJ, Koudstaal PJ, Algra A. Aspirin plus dipyridamole versus aspirin alone after cerebral ischaemia of arterial origin (ESPRIT): randomised controlled trial. *Lancet*. 2006;367(9523):1665-1673.
74. Barrett-Connor E, Mosca L, Collins P, et al. Effects of raloxifene on cardiovascular events and breast cancer in postmenopausal women. *N Engl J Med*. 2006;355(2):125-137.
75. Zacharski LR, Chow BK, Howes PS, et al. Reduction of iron stores and cardiovascular outcomes in patients with peripheral arterial disease: a randomized controlled trial. *Jama*. 2007;297(6):603-610.
76. Anand S, Yusuf S, Xie C, et al. Oral anticoagulant and antiplatelet therapy and peripheral arterial disease. *N Engl J Med*. 2007;357(3):217-227.
77. Patel A, MacMahon S, Chalmers J, et al. Effects of a fixed combination of perindopril and indapamide on macrovascular and microvascular outcomes in patients with type 2 diabetes mellitus (the ADVANCE trial): a randomised controlled trial. *Lancet*. 2007;370(9590):829-840.
78. Albert CM, Cook NR, Gaziano JM, et al. Effect of folic acid and B vitamins on risk of cardiovascular events and total mortality among women at high risk for cardiovascular disease: a randomized trial. *Jama*. 2008;299(17):2027-2036.
79. Tardif JC, McMurray JJ, Klug E, et al. Effects of succinobucol (AGI-1067) after an acute coronary syndrome: a randomised, double-blind, placebo-controlled trial. *Lancet*. 2008;371(9626):1761-1768.
80. Patel A, MacMahon S, Chalmers J, et al. Intensive blood glucose control and vascular outcomes in patients with type 2 diabetes. *N Engl J Med*. 2008;358(24):2560-2572.
81. Sacco RL, Diener HC, Yusuf S, et al. Aspirin and extended-release dipyridamole versus clopidogrel for recurrent stroke. *N Engl J Med*. 2008;359(12):1238-1251.
82. Yusuf S, Teo K, Anderson C, et al. Effects of the angiotensin-receptor blocker telmisartan on cardiovascular events in high-risk patients intolerant to angiotensin-converting enzyme inhibitors: a randomised controlled trial. *Lancet*. 2008;372(9644):1174-1183.
83. Young LH, Wackers FJ, Chyun DA, et al. Cardiac outcomes after screening for asymptomatic coronary artery disease in patients with type 2 diabetes: the DIAD study: a randomized controlled trial. *Jama*. 2009;301(15):1547-1555.
84. Home PD, Pocock SJ, Beck-Nielsen H, et al. Rosiglitazone evaluated for cardiovascular outcomes in oral agent combination therapy for type 2 diabetes (RECORD): a multicentre, randomised, open-label trial. *Lancet*. 2009;373(9681):2125-2135.
85. Holman RR, Haffner SM, McMurray JJ, et al. Effect of nateglinide on the incidence of diabetes and cardiovascular events. *N Engl J Med*. 2010;362(16):1463-1476.
86. McMurray JJ, Holman RR, Haffner SM, et al. Effect of valsartan on the incidence of diabetes and cardiovascular events. *N Engl J Med*. 2010;362(16):1477-1490.
87. Ginsberg HN, Elam MB, Lovato LC, et al. Effects of combination lipid therapy in type 2 diabetes mellitus. *N Engl J Med*. 2010;362(17):1563-1574.
88. Armitage JM, Bowman L, Clarke RJ, et al. Effects of homocysteine-lowering with folic acid plus vitamin B12 vs placebo on mortality and major morbidity in myocardial infarction survivors: a randomized trial. *Jama*. 2010;303(24):2486-2494.

89. Armitage J, Bowman L, Wallendszus K, et al. Intensive lowering of LDL cholesterol with 80 mg versus 20 mg simvastatin daily in 12,064 survivors of myocardial infarction: a double-blind randomised trial. *Lancet*. 2010;376(9753):1658-1669.
90. Gerstein HC, Miller ME, Genuth S, et al. Long-term effects of intensive glucose lowering on cardiovascular outcomes. *N Engl J Med*. 2011;364(9):818-828.
91. Haller H, Ito S, Izzo JL, Jr., et al. Olmesartan for the delay or prevention of microalbuminuria in type 2 diabetes. *N Engl J Med*. 2011;364(10):907-917.
92. Bousser MG, Amarenco P, Chamorro A, et al. Terutroban versus aspirin in patients with cerebral ischaemic events (PERFORM): a randomised, double-blind, parallel-group trial. *Lancet*. 2011;377(9782):2013-2022.
93. Boden WE, Probstfield JL, Anderson T, et al. Niacin in patients with low HDL cholesterol levels receiving intensive statin therapy. *N Engl J Med*. 2011;365(24):2255-2267.
94. Sesso HD, Christen WG, Bubes V, et al. Multivitamins in the prevention of cardiovascular disease in men: the Physicians' Health Study II randomized controlled trial. *Jama*. 2012;308(17):1751-1760.
95. Schwartz GG, Olsson AG, Abt M, et al. Effects of dalcetrapib in patients with a recent acute coronary syndrome. *N Engl J Med*. 2012;367(22):2089-2099.
96. Wing RR, Bolin P, Brancati FL, et al. Cardiovascular effects of intensive lifestyle intervention in type 2 diabetes. *N Engl J Med*. 2013;369(2):145-154.
97. Scirica BM, Bhatt DL, Braunwald E, et al. Saxagliptin and cardiovascular outcomes in patients with type 2 diabetes mellitus. *N Engl J Med*. 2013;369(14):1317-1326.
98. Lincoff AM, Tardif JC, Schwartz GG, et al. Effect of alogliptin on cardiovascular outcomes after acute coronary syndrome in patients with type 2 diabetes mellitus: the AleCardio randomized clinical trial. *Jama*. 2014;311(15):1515-1525.
99. White HD, Held C, Stewart R, et al. Darapladib for preventing ischemic events in stable coronary heart disease. *N Engl J Med*. 2014;370(18):1702-1711.
100. Maeng M, Tilsted HH, Jensen LO, et al. Differential clinical outcomes after 1 year versus 5 years in a randomised comparison of zotarolimus-eluting and sirolimus-eluting coronary stents (the SORT OUT III study): a multicentre, open-label, randomised superiority trial. *Lancet*. 2014;383(9934):2047-2056.
101. Landray MJ, Haynes R, Hopewell JC, et al. Effects of extended-release niacin with laropiprant in high-risk patients. *N Engl J Med*. 2014;371(3):203-212.
102. Fox K, Ford I, Steg PG, Tardif JC, Tendera M, Ferrari R. Ivabradine in stable coronary artery disease without clinical heart failure. *N Engl J Med*. 2014;371(12):1091-1099.
103. Ikeda Y, Shimada K, Teramoto T, et al. Low-dose aspirin for primary prevention of cardiovascular events in Japanese patients 60 years or older with atherosclerotic risk factors: a randomized clinical trial. *Jama*. 2014;312(23):2510-2520.
104. Douglas PS, Hoffmann U, Patel MR, et al. Outcomes of anatomical versus functional testing for coronary artery disease. *N Engl J Med*. 2015;372(14):1291-1300.
105. Huo Y, Li J, Qin X, et al. Efficacy of folic acid therapy in primary prevention of stroke among adults with hypertension in China: the CSPPT randomized clinical trial. *Jama*. 2015;313(13):1325-1335.
106. Hayward RA, Reaven PD, Wiitala WL, et al. Follow-up of glycemic control and cardiovascular outcomes in type 2 diabetes. *N Engl J Med*. 2015;372(23):2197-2206.
107. Cannon CP, Blazing MA, Giugliano RP, et al. Ezetimibe Added to Statin Therapy after Acute Coronary Syndromes. *N Engl J Med*. 2015;372(25):2387-2397.
108. Green JB, Bethel MA, Armstrong PW, et al. Effect of Sitagliptin on Cardiovascular Outcomes in Type 2 Diabetes. *N Engl J Med*. 2015;373(3):232-242.

109. Zinman B, Wanner C, Lachin JM, et al. Empagliflozin, Cardiovascular Outcomes, and Mortality in Type 2 Diabetes. *N Engl J Med*. 2015;373(22):2117-2128.
110. Wright JT, Jr., Williamson JD, Whelton PK, et al. A Randomized Trial of Intensive versus Standard Blood-Pressure Control. *N Engl J Med*. 2015;373(22):2103-2116.
111. Pfeffer MA, Claggett B, Diaz R, et al. Lixisenatide in Patients with Type 2 Diabetes and Acute Coronary Syndrome. *N Engl J Med*. 2015;373(23):2247-2257.
112. Sabaté M, Brugaletta S, Cequier A, et al. Clinical outcomes in patients with ST-segment elevation myocardial infarction treated with everolimus-eluting stents versus bare-metal stents (EXAMINATION): 5-year results of a randomised trial. *Lancet*. 2016;387(10016):357-366.
113. Nissen SE, Wolski KE, Prcela L, et al. Effect of Naltrexone-Bupropion on Major Adverse Cardiovascular Events in Overweight and Obese Patients With Cardiovascular Risk Factors: A Randomized Clinical Trial. *Jama*. 2016;315(10):990-1004.
114. Kernan WN, Viscoli CM, Furie KL, et al. Pioglitazone after Ischemic Stroke or Transient Ischemic Attack. *N Engl J Med*. 2016;374(14):1321-1331.
115. Yusuf S, Bosch J, Dagenais G, et al. Cholesterol Lowering in Intermediate-Risk Persons without Cardiovascular Disease. *N Engl J Med*. 2016;374(21):2021-2031.
116. Kelbæk H, Høfsten DE, Køber L, et al. Deferred versus conventional stent implantation in patients with ST-segment elevation myocardial infarction (DANAMI 3-DEFER): an open-label, randomised controlled trial. *Lancet*. 2016;387(10034):2199-2206.
117. Williamson JD, Supiano MA, Applegate WB, et al. Intensive vs Standard Blood Pressure Control and Cardiovascular Disease Outcomes in Adults Aged  $\geq 75$  Years: A Randomized Clinical Trial. *Jama*. 2016;315(24):2673-2682.
118. Marso SP, Daniels GH, Brown-Frandsen K, et al. Liraglutide and Cardiovascular Outcomes in Type 2 Diabetes. *N Engl J Med*. 2016;375(4):311-322.
119. McEvoy RD, Antic NA, Heeley E, et al. CPAP for Prevention of Cardiovascular Events in Obstructive Sleep Apnea. *N Engl J Med*. 2016;375(10):919-931.
120. Bønaa KH, Mannsverk J, Wiseth R, et al. Drug-Eluting or Bare-Metal Stents for Coronary Artery Disease. *N Engl J Med*. 2016;375(13):1242-1252.
121. Marso SP, Bain SC, Consoli A, et al. Semaglutide and Cardiovascular Outcomes in Patients with Type 2 Diabetes. *N Engl J Med*. 2016;375(19):1834-1844.
122. Lamy A, Devereaux PJ, Prabhakaran D, et al. Five-Year Outcomes after Off-Pump or On-Pump Coronary-Artery Bypass Grafting. *N Engl J Med*. 2016;375(24):2359-2368.
123. Sabatine MS, Giugliano RP, Keech AC, et al. Evolocumab and Clinical Outcomes in Patients with Cardiovascular Disease. *N Engl J Med*. 2017;376(18):1713-1722.
124. Shroyer AL, Hattler B, Wagner TH, et al. Five-Year Outcomes after On-Pump and Off-Pump Coronary-Artery Bypass. *N Engl J Med*. 2017;377(7):623-632.
125. Holman RR, Bethel MA, Mentz RJ, et al. Effects of Once-Weekly Exenatide on Cardiovascular Outcomes in Type 2 Diabetes. *N Engl J Med*. 2017;377(13):1228-1239.
126. White WB, Saag KG, Becker MA, et al. Cardiovascular Safety of Febuxostat or Allopurinol in Patients with Gout. *N Engl J Med*. 2018;378(13):1200-1210.
127. Newby DE, Adamson PD, Berry C, et al. Coronary CT Angiography and 5-Year Risk of Myocardial Infarction. *N Engl J Med*. 2018;379(10):924-933.
128. Vranckx P, Valgimigli M, Jüni P, et al. Ticagrelor plus aspirin for 1 month, followed by ticagrelor monotherapy for 23 months vs aspirin plus clopidogrel or ticagrelor for 12 months, followed by aspirin monotherapy for 12 months after implantation of a drug-eluting stent: a multicentre, open-label, randomised superiority trial. *Lancet*. 2018;392(10151):940-949.

129. Gaziano JM, Brotons C, Coppolecchia R, et al. Use of aspirin to reduce risk of initial vascular events in patients at moderate risk of cardiovascular disease (ARRIVE): a randomised, double-blind, placebo-controlled trial. *Lancet*. 2018;392(10152):1036-1046.
130. Bowman L, Mafham M, Wallendszus K, et al. Effects of Aspirin for Primary Prevention in Persons with Diabetes Mellitus. *N Engl J Med*. 2018;379(16):1529-1539.
131. Bowman L, Mafham M, Wallendszus K, et al. Effects of n-3 Fatty Acid Supplements in Diabetes Mellitus. *N Engl J Med*. 2018;379(16):1540-1550.
132. McNeil JJ, Wolfe R, Woods RL, et al. Effect of Aspirin on Cardiovascular Events and Bleeding in the Healthy Elderly. *N Engl J Med*. 2018;379(16):1509-1518.
133. Schwartz GG, Steg PG, Szarek M, et al. Alirocumab and Cardiovascular Outcomes after Acute Coronary Syndrome. *N Engl J Med*. 2018;379(22):2097-2107.
134. Rosenstock J, Perkovic V, Johansen OE, et al. Effect of Linagliptin vs Placebo on Major Cardiovascular Events in Adults With Type 2 Diabetes and High Cardiovascular and Renal Risk: The CARMELINA Randomized Clinical Trial. *Jama*. 2019;321(1):69-79.
135. Bhatt DL, Steg PG, Miller M, et al. Cardiovascular Risk Reduction with Icosapent Ethyl for Hypertriglyceridemia. *N Engl J Med*. 2019;380(1):11-22.
136. Manson JE, Cook NR, Lee IM, et al. Marine n-3 Fatty Acids and Prevention of Cardiovascular Disease and Cancer. *N Engl J Med*. 2019;380(1):23-32.
137. Manson JE, Cook NR, Lee IM, et al. Vitamin D Supplements and Prevention of Cancer and Cardiovascular Disease. *N Engl J Med*. 2019;380(1):33-44.
138. Zenati MA, Bhatt DL, Bakaeen FG, et al. Randomized Trial of Endoscopic or Open Vein-Graft Harvesting for Coronary-Artery Bypass. *N Engl J Med*. 2019;380(2):132-141.
139. Wiviott SD, Raz I, Bonaca MP, et al. Dapagliflozin and Cardiovascular Outcomes in Type 2 Diabetes. *N Engl J Med*. 2019;380(4):347-357.
140. Macdougall IC, White C, Anker SD, et al. Intravenous Iron in Patients Undergoing Maintenance Hemodialysis. *N Engl J Med*. 2019;380(5):447-458.
141. Ridker PM, Everett BM, Pradhan A, et al. Low-Dose Methotrexate for the Prevention of Atherosclerotic Events. *N Engl J Med*. 2019;380(8):752-762.
142. Gerstein HC, Colhoun HM, Dagenais GR, et al. Dulaglutide and cardiovascular outcomes in type 2 diabetes (REWIND): a double-blind, randomised placebo-controlled trial. *Lancet*. 2019;394(10193):121-130.
143. Roshandel G, Khoshnia M, Poustchi H, et al. Effectiveness of polypill for primary and secondary prevention of cardiovascular diseases (PolyIran): a pragmatic, cluster-randomised trial. *Lancet*. 2019;394(10199):672-683.
144. Yasuda S, Kaikita K, Akao M, et al. Antithrombotic Therapy for Atrial Fibrillation with Stable Coronary Disease. *N Engl J Med*. 2019;381(12):1103-1113.
145. Steg PG, Bhatt DL, Simon T, et al. Ticagrelor in Patients with Stable Coronary Disease and Diabetes. *N Engl J Med*. 2019;381(14):1309-1320.
146. Mehta SR, Wood DA, Storey RF, et al. Complete Revascularization with Multivessel PCI for Myocardial Infarction. *N Engl J Med*. 2019;381(15):1411-1421.
147. Amarenco P, Kim JS, Labreuche J, et al. A Comparison of Two LDL Cholesterol Targets after Ischemic Stroke. *N Engl J Med*. 2020;382(1):9.
148. Ray KK, Nicholls SJ, Buhr KA, et al. Effect of Apabetalone Added to Standard Therapy on Major Adverse Cardiovascular Events in Patients With Recent Acute Coronary Syndrome and Type 2 Diabetes: A Randomized Clinical Trial. *Jama*. 2020;323(16):1565-1573.
149. Bonaca MP, Bauersachs RM, Anand SS, et al. Rivaroxaban in Peripheral Artery Disease after Revascularization. *New England Journal of Medicine*. 2020;382(21):1994-2004.

150. Ferrari R, Ford I, Fox K, et al. Efficacy and safety of trimetazidine after percutaneous coronary intervention (ATPCI): a randomised, double-blind, placebo-controlled trial. *Lancet*. 2020;396(10254):830-838.
151. Nidorf SM, Fiolet ATL, Mosterd A, et al. Colchicine in Patients with Chronic Coronary Disease. *N Engl J Med*. 2020;383(19):1838-1847.
